# Supplementary material for: UHPLC-MS Characterization and Biological Insights of Different Solvent Extracts of Two Achillea Species (A. aleppica and A. santolinoides) from Turkey
Source: MDPI journal article supplement (doi:10.3390/antiox10081180), 2021-07-24
Supplement: s1 [file s1]

Table S1. Percentages of explained variances, eigenvalues and contribution of metabolites on the first six components of PCA

|                                        | PC1    | PC2   | PC3   | PC4    | PC5    | PC6    |
|----------------------------------------|--------|-------|-------|--------|--------|--------|
| Percentages of explained variances (%) | 35.34  | 18.36 | 09.20 | 07.57  | 06.51  | 05.99  |
| Eigenvalues                            | 33.57  | 17.44 | 8.74  | 7.19   | 6.19   | 5.69   |
| C1                                     | 1,692  | 0,385 | 1,350 | 1,405  | 0,003  | 1,166  |
| C2                                     | 1,979  | 0,509 | 0,120 | 0,587  | 0,101  | 1,164  |
| C3                                     | 0,488  | 2,214 | 2,385 | 1,805  | 1,204  | 0,450  |
| C4                                     | 0,000  | 0,691 | 2,960 | 2,810  | 3,147* | 0,851  |
| C5                                     | 1,938  | 1,202 | 0,054 | 0,980  | 0,000  | 0,118  |
| C6                                     | 0,121  | 1,116 | 2,810 | 0,768  | 1,308  | 2,012  |
| C7                                     | 1,181  | 0,972 | 1,875 | 1,487  | 0,008  | 1,268  |
| C8                                     | 2,449* | 0,290 | 0,008 | 0,165  | 0,001  | 0,337  |
| C9                                     | 2,142* | 0,003 | 0,476 | 0,220  | 2,753  | 0,002  |
| C10                                    | 2,018* | 0,172 | 1,256 | 0,065  | 0,224  | 2,026  |
| C11                                    | 0,976  | 0,017 | 1,765 | 0,054  | 1,131  | 6,291* |
| C12                                    | 2,077* | 0,373 | 0,208 | 2,137  | 0,020  | 0,175  |
| C13                                    | 2,436* | 0,278 | 0,008 | 0,107  | 0,001  | 0,260  |
| C14                                    | 0,100  | 0,481 | 1,080 | 0,000  | 0,152  | 6,746* |
| C15                                    | 2,713* | 0,000 | 0,346 | 0,016  | 0,004  | 0,001  |
| C16                                    | 0,501  | 0,006 | 0,991 | 1,487  | 3,088* | 1,250  |
| C17                                    | 1,978  | 1,033 | 0,056 | 0,011  | 0,424  | 0,421  |
| C18                                    | 0,007  | 0,258 | 2,070 | 0,000  | 2,358  | 8,445* |
| C19                                    | 1,361  | 0,145 | 0,022 | 0,374  | 0,137  | 1,936  |
| C20                                    | 0,533  | 2,020 | 0,082 | 0,087  | 4,414* | 0,982  |
| C21                                    | 0,418  | 0,066 | 0,288 | 0,291  | 1,736  | 0,697  |
| C22                                    | 0,059  | 0,270 | 2,694 | 0,031  | 1,664  | 7,865* |
| C23                                    | 0,935  | 0,837 | 0,043 | 0,166  | 3,077* | 4,430* |
| C24                                    | 1,536  | 0,712 | 0,420 | 0,585  | 0,347  | 0,017  |
| C24a                                   | 0,430  | 2,553 | 0,159 | 0,949  | 0,593  | 2,427  |
| C25                                    | 1,976  | 0,469 | 0,278 | 2,340  | 0,013  | 0,187  |
| C26                                    | 0,164  | 0,046 | 0,141 | 2,641  | 0,253  | 0,308  |
| C27                                    | 1,104  | 0,126 | 1,217 | 4,615* | 0,737  | 0,096  |
| C28                                    | 2,116* | 0,349 | 0,112 | 2,154  | 0,004  | 0,101  |

|     |        |       |        |        |        |        |
|-----|--------|-------|--------|--------|--------|--------|
| C29 | 0,128  | 2,750 | 2,436  | 0,776  | 0,431  | 1,758  |
| C30 | 1,154  | 0,108 | 1,826  | 0,029  | 0,756  | 5,477* |
| C31 | 0,592  | 0,328 | 1,746  | 1,832  | 0,440  | 0,113  |
| C32 | 2,197* | 0,030 | 0,258  | 0,652  | 1,233  | 0,096  |
| C33 | 1,450  | 1,979 | 0,021  | 1,504  | 0,011  | 0,046  |
| C34 | 2,173* | 0,311 | 0,050  | 2,453  | 0,038  | 0,001  |
| C35 | 0,780  | 0,995 | 1,071  | 3,148* | 0,264  | 0,212  |
| C36 | 1,636  | 1,351 | 0,395  | 0,309  | 0,002  | 0,117  |
| C37 | 2,356* | 0,520 | 0,152  | 1,217  | 0,001  | 0,005  |
| C38 | 2,269* | 0,115 | 0,071  | 1,016  | 0,574  | 0,061  |
| C39 | 1,300  | 0,046 | 0,274  | 0,174  | 0,807  | 7,088* |
| C40 | 0,451  | 2,422 | 0,014  | 1,101  | 1,953  | 0,848  |
| C41 | 2,027* | 0,181 | 0,258  | 1,816  | 0,204  | 0,188  |
| C42 | 1,590  | 0,030 | 0,085  | 1,737  | 1,477  | 0,934  |
| C43 | 1,709  | 0,530 | 0,022  | 1,403  | 2,198  | 0,136  |
| C44 | 2,225* | 0,042 | 0,274  | 0,711  | 0,940  | 0,113  |
| C45 | 0,263  | 0,000 | 5,301* | 1,071  | 0,004  | 0,334  |
| C46 | 1,443  | 0,172 | 0,310  | 1,439  | 0,659  | 0,021  |
| C47 | 1,664  | 1,063 | 0,731  | 0,246  | 1,779  | 0,643  |
| C48 | 2,080* | 0,324 | 0,297  | 2,124  | 0,021  | 0,186  |
| C49 | 1,551  | 1,675 | 0,125  | 1,160  | 0,033  | 0,086  |
| C50 | 0,582  | 0,863 | 0,414  | 0,787  | 0,894  | 0,000  |
| C51 | 1,227  | 1,423 | 0,185  | 3,565* | 0,000  | 0,225  |
| C52 | 1,228  | 0,063 | 2,604  | 0,937  | 0,166  | 2,932  |
| C53 | 2,163* | 0,715 | 1,173  | 0,161  | 0,453  | 0,015  |
| C54 | 1,232  | 0,063 | 2,599  | 0,927  | 0,169  | 2,919  |
| C55 | 2,566* | 0,095 | 0,260  | 0,944  | 0,005  | 0,016  |
| C56 | 1,115  | 1,591 | 0,098  | 3,509* | 0,004  | 0,496  |
| C57 | 0,835  | 2,026 | 0,580  | 1,003  | 0,231  | 0,389  |
| C58 | 0,050  | 0,285 | 1,739  | 1,241  | 0,200  | 0,730  |
| C59 | 0,805  | 0,000 | 0,891  | 0,517  | 5,450* | 0,912  |
| C60 | 1,368  | 0,284 | 2,185  | 0,028  | 0,192  | 2,268  |
| C61 | 0,482  | 0,225 | 1,216  | 0,689  | 3,934* | 0,143  |
| C62 | 1,403  | 0,436 | 0,291  | 0,999  | 1,492  | 0,346  |
| C63 | 1,177  | 0,207 | 0,454  | 1,693  | 0,632  | 1,063  |
| C64 | 0,888  | 1,066 | 0,398  | 0,128  | 0,026  | 0,763  |

|     |        |        |        |        |        |        |
|-----|--------|--------|--------|--------|--------|--------|
| C65 | 1,315  | 0,584  | 0,011  | 0,051  | 1,485  | 0,019  |
| C66 | 1,431  | 0,126  | 1,573  | 1,459  | 2,667  | 0,772  |
| C67 | 2,398* | 0,161  | 0,079  | 0,685  | 0,500  | 0,137  |
| C68 | 0,482  | 0,225  | 1,216  | 0,689  | 3,934* | 0,143  |
| C69 | 2,258* | 0,019  | 0,248  | 0,251  | 2,399  | 0,061  |
| C70 | 1,154  | 0,000  | 2,850  | 0,137  | 0,817  | 0,657  |
| C71 | 0,427  | 3,487* | 0,354  | 0,522  | 0,316  | 0,142  |
| C72 | 0,487  | 3,525* | 0,120  | 1,122  | 1,118  | 0,105  |
| C73 | 0,074  | 3,567* | 1,200  | 2,115  | 0,246  | 0,319  |
| C74 | 0,018  | 3,924* | 0,231  | 1,375  | 0,449  | 0,072  |
| C75 | 0,000  | 1,146  | 0,463  | 1,782  | 6,604* | 1,032  |
| C76 | 0,505  | 0,816  | 5,034* | 0,990  | 0,038  | 0,266  |
| C77 | 0,138  | 4,539* | 0,205  | 1,380  | 0,025  | 0,073  |
| C78 | 0,138  | 4,539* | 0,205  | 1,380  | 0,025  | 0,073  |
| C79 | 0,010  | 4,055* | 0,000  | 0,272  | 0,200  | 0,513  |
| C80 | 0,092  | 2,289  | 2,427  | 0,010  | 0,643  | 0,280  |
| C81 | 0,051  | 5,382* | 0,282  | 0,128  | 0,009  | 0,000  |
| C82 | 0,148  | 3,881* | 0,544  | 1,035  | 0,271  | 0,135  |
| C83 | 0,132  | 2,348  | 0,637  | 0,966  | 1,521  | 3,334* |
| C84 | 0,580  | 2,398  | 0,450  | 0,308  | 0,990  | 0,640  |
| C85 | 0,406  | 0,094  | 6,499* | 2,050  | 0,675  | 0,280  |
| C86 | 0,156  | 2,002  | 0,087  | 0,125  | 2,638  | 2,649  |
| C87 | 0,006  | 1,275  | 7,142* | 0,642  | 0,553  | 0,059  |
| C88 | 0,269  | 0,701  | 0,863  | 0,072  | 0,006  | 0,600  |
| C89 | 0,064  | 2,451  | 0,406  | 3,814* | 1,833  | 0,305  |
| C90 | 0,007  | 0,849  | 7,117* | 0,058  | 0,028  | 0,543  |
| C91 | 0,046  | 1,759  | 1,572  | 0,065  | 5,204* | 2,311  |
| C92 | 0,962  | 0,051  | 1,133  | 1,239  | 4,161* | 0,081  |
| C93 | 1,337  | 0,997  | 0,502  | 1,829  | 2,056  | 0,334  |
| C94 | 1,321  | 0,898  | 0,472  | 2,065  | 2,009  | 0,356  |

Table S2. Percentages of explained variances, eigenvalues and contribution of biological activities on the first three components of PCA

|                                        |                    | <b>PC1</b>   | <b>PC2</b>   | <b>PC2</b>   |
|----------------------------------------|--------------------|--------------|--------------|--------------|
| Percentages of explained variances (%) |                    | <b>63.14</b> | <b>15.12</b> | <b>10.25</b> |
| Eigenvalue                             |                    | <b>6.94</b>  | <b>1.66</b>  | <b>1.12</b>  |
| Biological activities                  | <b>DPPH</b>        | 11,588*      | 6,255        | 1,772        |
|                                        | <b>ABTS</b>        | 12,548*      | 6,207        | 0,289        |
|                                        | <b>CUPRAC</b>      | 11,543*      | 8,557        | 2,165        |
|                                        | <b>FRAP</b>        | 11,989*      | 7,330        | 2,554        |
|                                        | <b>MCA</b>         | 0,019        | 28,044*      | 30,267*      |
|                                        | <b>PBD</b>         | 2,771        | 0,172        | 56,958*      |
|                                        | <b>AChE</b>        | 8,604        | 17,109*      | 4,327        |
|                                        | <b>BChE</b>        | 12,371*      | 0,039        | 0,533        |
|                                        | <b>Tyrosinase</b>  | 5,814        | 17,364*      | 0,975        |
|                                        | <b>Amylase</b>     | 12,531*      | 2,574        | 0,130        |
|                                        | <b>Glucosidase</b> | 10,221*      | 6,350        | 0,028        |

\*Biological activities having highest contribution scores on principal components



1 Table S3. Upregulated and downregulated mRNA by the six sesquiterpene lactones and some phenolic compounds

|                  | Artabsin                                                                                                                                                                                                                                                                                                                                                                                   | Dehydroleucodien                                                                                                                                                                                                                                                                                                                                                                                                                              | Dihydrosantamarin                                                                                                                                                                                                                                                                                                                                                                                                                                 | Leucodin                                                                                                                                                                                                                                                                                                                                                                                                                                                                                                           | Matricin                                                                                                                                                                                                                                                                                                                                                                                                                                                                                                                                         | Tanaparthin peroxide                                                                                                                                                                                                                                                                                                                                                                                                                                                       | Neochlorogenic                                                                                                                                                                                                                                                                                                                                                                                                            | Chlorogenic acid                                                                                                                                                                                                                                                                                                                                                                                                          | Homoorientin                                                                                                                                                                                                                                                                                                                                                                                                         | Vitexin                                                                                                                                                                                                                                                                                                                                                                                                                    | Isovitexin                                                                                                                                                                                                                                                                                                                                                                                    |
|------------------|--------------------------------------------------------------------------------------------------------------------------------------------------------------------------------------------------------------------------------------------------------------------------------------------------------------------------------------------------------------------------------------------|-----------------------------------------------------------------------------------------------------------------------------------------------------------------------------------------------------------------------------------------------------------------------------------------------------------------------------------------------------------------------------------------------------------------------------------------------|---------------------------------------------------------------------------------------------------------------------------------------------------------------------------------------------------------------------------------------------------------------------------------------------------------------------------------------------------------------------------------------------------------------------------------------------------|--------------------------------------------------------------------------------------------------------------------------------------------------------------------------------------------------------------------------------------------------------------------------------------------------------------------------------------------------------------------------------------------------------------------------------------------------------------------------------------------------------------------|--------------------------------------------------------------------------------------------------------------------------------------------------------------------------------------------------------------------------------------------------------------------------------------------------------------------------------------------------------------------------------------------------------------------------------------------------------------------------------------------------------------------------------------------------|----------------------------------------------------------------------------------------------------------------------------------------------------------------------------------------------------------------------------------------------------------------------------------------------------------------------------------------------------------------------------------------------------------------------------------------------------------------------------|---------------------------------------------------------------------------------------------------------------------------------------------------------------------------------------------------------------------------------------------------------------------------------------------------------------------------------------------------------------------------------------------------------------------------|---------------------------------------------------------------------------------------------------------------------------------------------------------------------------------------------------------------------------------------------------------------------------------------------------------------------------------------------------------------------------------------------------------------------------|----------------------------------------------------------------------------------------------------------------------------------------------------------------------------------------------------------------------------------------------------------------------------------------------------------------------------------------------------------------------------------------------------------------------|----------------------------------------------------------------------------------------------------------------------------------------------------------------------------------------------------------------------------------------------------------------------------------------------------------------------------------------------------------------------------------------------------------------------------|-----------------------------------------------------------------------------------------------------------------------------------------------------------------------------------------------------------------------------------------------------------------------------------------------------------------------------------------------------------------------------------------------|
| Upregulated mRNA | BRMS1<br>SFRP1<br>MAP7<br>CYP3A4<br>HOXA11<br>APBP2<br>CASP2<br>ALDOA<br>GNMT<br>PFKFB2<br>SH3BGRL<br>TRIM13<br>NUCB2<br>FOXO4<br>SCGB1D2<br>DNAJB14<br>GAL<br>PPP1CB<br>CHEK1<br>FADS1<br>TACC1<br>CACNG4<br>CHRNE<br>CISH<br>EPB41L3<br>PLK3<br>P2RY14<br>MYT1<br>KCNH2<br>PLLP<br>SLC25A4<br>ZYX<br>SFTPB<br>NRTN<br>WISP2<br>ENC1<br>MT1L<br>WT1<br>HMGCR<br>COL22A1<br>KLK13<br>ITGA6 | PPP1CB<br>DNAJB14<br>FOXO1<br>CACNG4<br>CHRNE<br>PFKFB2<br>SH3BGRL<br>TRIM13<br>COL22A1<br>KLK13<br>CNN2<br>DYSF<br>FAM110C<br>MYO5B<br>PPFIBP2<br>LGALS9<br>GAL<br>PLLP<br>SLC25A4<br>ZYX<br>TMEM56<br>FOXO4<br>CREB3L1<br>RNASEL<br>PDZD2<br>IL4R<br>KLK7<br>PLXNA2<br>SERPINB8<br>ABAT<br>ERMP1<br>MSX2<br>EPB41L3<br>TRIOBP<br>WT1<br>SQLE<br>ITGAM<br>CD68<br>NUCB2<br>NUDT11<br>FAM49A<br>SLC4A11<br>SLC45A2<br>GNMT<br>C8ORF4<br>FOXC1 | MYT1<br>PFKFB2<br>SH3BGRL<br>TRIM13<br>CACNG4<br>CHRNE<br>SH3BGRL<br>TRIM13<br>DNAJB14<br>CREB3L1<br>RNASEL<br>KCNH2<br>PLLP<br>SLC25A4<br>ZYX<br>LGALS9<br>FAM110C<br>MYO5B<br>PPFIBP2<br>DYSF<br>TMEM56<br>FOXO4<br>HOXA11<br>IL4R<br>HSPCB<br>PBK<br>WISP2<br>FOXO4<br>SERPINB8<br>COL22A1<br>KLK13<br>TMEM38B<br>KRT6A<br>WT1<br>NUDT11<br>GAS6<br>CD68<br>CDC20<br>UGT2B15<br>ABCC13<br>AURKB<br>CLIC6<br>CSR2BP<br>CTPS1<br>DEPDC1B<br>PCP4 | PPP1CB<br>DNAJB14<br>FOXO4<br>FOXO1<br>PFKFB2<br>SH3BGRL<br>TRIM13<br>WT1<br>COL22A1<br>KLK13<br>CACNG4<br>CHRNE<br>CACNG4<br>CNN2<br>DYSF<br>FAM110C<br>MYO5B<br>PPFIBP2<br>FAM110C<br>LGALS9<br>CYP3A4<br>CYP2B6<br>DNAJB14<br>CYP2B6<br>PLXNA2<br>SLC45A2<br>KCNH2<br>PLLP<br>SLC25A4<br>ZYX<br>PDZD2<br>TMEM56<br>HOXA11<br>ALDOA<br>CREB3L1<br>RNASEL<br>MAP7<br>MYT1<br>SERPINB8<br>BRMS1<br>EPB41L3<br>P2RY14<br>PBK<br>IL4R<br>PLXNA2<br>KLK7<br>S100A9<br>PBK<br>SLC4A11<br>GAL<br>MAP3K8<br>MT1L<br>ABAT | AURKA<br>MAP7<br>WT1<br>CYP3A4<br>COL22A1<br>KLK13<br>CD68<br>BRMS1<br>MAP7<br>TRIM13<br>NUDT11<br>HMGCR<br>PFKFB2<br>SH3BGRL<br>FOXO4<br>CACNG4<br>CHRNE<br>CNN2<br>HOXA11<br>BRMS1<br>S100A9<br>PPP1CB<br>DYSF<br>FADS1<br>DNAJB14<br>CYP2B6<br>KCNH2<br>PLXNA2<br>SLC45A2<br>KCNH2<br>PLLP<br>SLC25A4<br>ZYX<br>FADS1<br>CAMKK2<br>CREB3L1<br>RNASEL<br>WT1<br>SLC45A2<br>COL22A1<br>KLK13<br>EPB41L3<br>CNN2<br>DYSF<br>FAM110C<br>PBK<br>MYO5B<br>PPFIBP2<br>FOXO4<br>LGALS9<br>SFRP1<br>BCAS1<br>GNMT<br>ABAT<br>ERMP1<br>MSX2<br>SERPINB8 | SQLE<br>IL4R<br>PLXNA2<br>SERPINB8<br>FAM49A<br>CD68<br>BRMS1<br>MAP7<br>TRIM13<br>NUDT11<br>PFKFB2<br>SH3BGRL<br>TRIM13<br>CACNG4<br>CHRNE<br>CNN2<br>HOXA11<br>BRMS1<br>NUCB2<br>DNAJB14<br>APPBP2<br>GNMT<br>PLA2G6<br>ITGA6<br>PLLP<br>MAP7<br>AURKA<br>FADS1<br>CAMKK2<br>CREB3L1<br>RNASEL<br>WT1<br>SLC45A2<br>COL22A1<br>KLK13<br>EPB41L3<br>CNN2<br>DYSF<br>FAM110C<br>MYO5B<br>PPFIBP2<br>FOXO4<br>LGALS9<br>SFRP1<br>BCAS1<br>TMEM56<br>CHEK1<br>HMGCR<br>TMEM3 | TCF12<br>SMPD1<br>VASP<br>OGG1<br>CASP2<br>FTL<br>FGFR1<br>PCDH17<br>ERBB2<br>COL22A1<br>KLK13<br>LGALS9<br>WT1<br>LST1<br>S100A9<br>GAS6<br>HMGCR<br>FOXO1<br>PLA2G6<br>ITGA6<br>MT1L<br>MAP7<br>AURKA<br>FADS1<br>CAMKK2<br>CREB3L1<br>RNASEL<br>WT1<br>SLC45A2<br>COL22A1<br>KLK13<br>EPB41L3<br>CNN2<br>DYSF<br>FAM110C<br>MYO5B<br>PPFIBP2<br>FOXO4<br>LGALS9<br>SFRP1<br>BCAS1<br>TMEM56<br>CHEK1<br>HMGCR<br>TMEM3 | TCF12<br>SMPD1<br>VASP<br>OGG1<br>CASP2<br>FTL<br>FGFR1<br>PCDH17<br>ERBB2<br>COL22A1<br>KLK13<br>LGALS9<br>WT1<br>LST1<br>S100A9<br>GAS6<br>HMGCR<br>FOXO1<br>PLA2G6<br>ITGA6<br>MT1L<br>MAP7<br>AURKA<br>FADS1<br>CAMKK2<br>CREB3L1<br>RNASEL<br>WT1<br>SLC45A2<br>COL22A1<br>KLK13<br>EPB41L3<br>CNN2<br>DYSF<br>FAM110C<br>MYO5B<br>PPFIBP2<br>FOXO4<br>LGALS9<br>SFRP1<br>BCAS1<br>TMEM56<br>CHEK1<br>HMGCR<br>TMEM3 | CEP72<br>TCF12<br>DSTN<br>NOTCH1<br>RRM2B<br>TMEM3<br>KDELC1<br>8B<br>KDELC1<br>FAM171<br>A1<br>HSPA12<br>A<br>FAM171<br>LIM2<br>MAP3K7<br>IP3<br>NKAIN1<br>PQLC3<br>RPPH1<br>SEMA3<br>G<br>SLC37A<br>2<br>STBD1<br>TMEM2<br>TRIM21<br>WNT11<br>ZIC2<br>TMEM3<br>8B<br>HES1<br>CD151<br>ELOVL1<br>GAL3ST<br>1<br>GCOM1<br>KAT2B<br>PLEKH<br>M1<br>SLC20A<br>1<br>CMBL<br>CTTN<br>SLC4A1<br>1<br>ANKRA<br>2<br>IGDCC4 | CEP72<br>TCF12<br>DSTN<br>RRM2B<br>TMEM3<br>KDELC1<br>8B<br>KDELC1<br>PGM2<br>NOTCH1<br>HES1<br>FAM171<br>A1<br>HSPA12<br>A<br>LIM2<br>MAP3K7<br>IP3<br>NKAIN1<br>PQLC3<br>RPPH1<br>SEMA3<br>G<br>SLC37A<br>2<br>STBD1<br>TMEM2<br>TRIM21<br>WNT11<br>ZIC2<br>SLC20A<br>1<br>CMBL<br>CD151<br>ELOVL1<br>GAL3ST<br>1<br>GCOM1<br>KAT2B<br>PLEKH<br>M1<br>SLC20A<br>1<br>CMBL<br>CTTN<br>SLC4A1<br>1<br>ANKRA<br>2<br>IGDCC4 | CEP72<br>TCF12<br>DSTN<br>KDELC1<br>PGM2<br>TMEM3<br>8B<br>NOTCH1<br>RRM2B<br>HES1<br>FAM171<br>A1<br>HSPA12<br>A<br>LIM2<br>MAP3K7<br>IP3<br>NKAIN1<br>PQLC3<br>RPPH1<br>SEMA3<br>G<br>SLC37A<br>2<br>STBD1<br>TMEM2<br>TRIM21<br>WNT11<br>ZIC2<br>CD151<br>ELOVL1<br>GAL3ST<br>1<br>GCOM1<br>KAT2B<br>PLEKH<br>M1<br>SLC20A<br>1<br>CMBL<br>CTTN<br>GFRA1<br>ANKRA<br>2<br>IGDCC4<br>THAP10 |

|  |  |                                                                                                                                              |                                                                                                                                                                                                                                                                                                                                                                                                                                                                         |                                                                                                                    |                                                                                          |                                                                                                                                                                                 |  |  |                                                                                                                                                                                                                                                                                                                                                                                                                                                                                                                                                                                                                                                                      |                                                                                                                                                                                                                                                                                                                                                                                                                                                                                   |                                                                                                                                                                                                                                                                                                                                                                                                                                   |
|--|--|----------------------------------------------------------------------------------------------------------------------------------------------|-------------------------------------------------------------------------------------------------------------------------------------------------------------------------------------------------------------------------------------------------------------------------------------------------------------------------------------------------------------------------------------------------------------------------------------------------------------------------|--------------------------------------------------------------------------------------------------------------------|------------------------------------------------------------------------------------------|---------------------------------------------------------------------------------------------------------------------------------------------------------------------------------|--|--|----------------------------------------------------------------------------------------------------------------------------------------------------------------------------------------------------------------------------------------------------------------------------------------------------------------------------------------------------------------------------------------------------------------------------------------------------------------------------------------------------------------------------------------------------------------------------------------------------------------------------------------------------------------------|-----------------------------------------------------------------------------------------------------------------------------------------------------------------------------------------------------------------------------------------------------------------------------------------------------------------------------------------------------------------------------------------------------------------------------------------------------------------------------------|-----------------------------------------------------------------------------------------------------------------------------------------------------------------------------------------------------------------------------------------------------------------------------------------------------------------------------------------------------------------------------------------------------------------------------------|
|  |  | APPBP2<br>MAP3K8<br>BMPRI1B<br>CYP2S1<br>GBP1<br>SFTPBP<br>PSAP<br>MAP7<br>FADS1<br>S100A9<br>BRMS1<br>ITGA6<br>TSKU<br>ALDOA<br>CA2<br>ENC1 | PTGER3<br>SAC3D1<br>SFXN2<br>SLC39A8<br>FOXC1<br>EPB41L3<br>SLC45A2<br>TRIOBP<br>MCM6<br>MCM7<br>KLK7<br>TK1<br>ERBB2<br>C8ORF4<br>CYP2S1<br>SCGB2A1<br>BLM<br>BMPRI1B<br>KIAA0101<br>GMNN<br>PLK4<br>GFRA1<br>NUCB2<br>GAL<br>SLC4A11<br>FANCI<br>TRIP13<br>ARL3<br>CENPA<br>FBXO5<br>GINS2<br>KIF11<br>KIF15<br>NCAPD2<br>PLOC1<br>PRIM1<br>TACC3<br>UBE2T<br>TSKU<br>FADS1<br>ATAD2<br>CENPF<br>HMGB2<br>KIF20A<br>KIF4A<br>SMC2<br>APPBP2<br>ECT2<br>IGFBP2<br>HES2 | ERMP1<br>MSX2<br>SFRP1<br>C8ORF4<br>ENC1<br>FOXC1<br>HMGCR<br>CYP2S1<br>EXOSC4<br>ITGA6<br>KRT6A<br>FADS1<br>AURKA | IL4R<br>SFRP1<br>FOXO1<br>EPB41L3<br>ABCA1<br>PDZD2<br>NUCB2<br>CDC20<br>SLC4A11<br>MT1L | CDC42EP3<br>KLK2<br>TRIOBP<br>ABAT<br>ERMP1<br>MSX2<br>PDZD2<br>FOXO1<br>HES2<br>KLK7<br>SCGB1D2<br>CISH<br>GAL<br>SLC4A11<br>HOXA11<br>NRTN<br>ALDOA<br>FOXC1<br>ENC1<br>ITGA6 |  |  | THAP10<br>C1ORF6<br>3<br>BLM<br>MOD2<br>PFKFB2<br>SH3BGR<br>L<br>TRIM13<br>GAS6<br>OGG1<br>FDXR<br>AHRR<br>SFRP1<br>RPS6KA<br>3<br>GALR2<br>UBE3B<br>COX5B<br>FAM46B<br>S100A13<br>RGL1<br>SLC39A<br>4<br>GFRA1<br>ETFB<br>PLK3<br>SMPD1<br>CYP2S1<br>TRIOBP<br>CDT1<br>MASTL<br>MCM10<br>IER5L<br>ERBB2<br>ABCC13<br>AURKB<br>CLIC6<br>CSR2P2B<br>P<br>CTPS1<br>DEPDC1<br>B<br>PCP4<br>PTGER3<br>SAC3D1<br>SFXN2<br>SLC39A<br>8<br>GFRA1<br>ETFB<br>PLK3<br>SMPD1<br>CYP2S1<br>TRIOBP<br>CDT1<br>MASTL<br>MCM10<br>IER5L<br>ERBB2<br>ABCC13<br>AURKB<br>CLIC6<br>CSR2P2B<br>P<br>CTPS1<br>DEPDC1<br>B<br>PCP4<br>PTGER3<br>SAC3D1<br>SFXN2<br>SLC39A<br>8<br>SH3RF1 | IGDCC4<br>THAP10<br>GFRA1<br>C1ORF6<br>3<br>OGG1<br>CDT1<br>MASTL<br>MCM10<br>MOD2<br>ABCC13<br>AURKB<br>CLIC6<br>CSR2P2B<br>P<br>CTPS1<br>DEPDC1<br>B<br>PCP4<br>PTGER3<br>SAC3D1<br>SFXN2<br>SLC39A<br>8<br>MCM6<br>MCM7<br>PPP1R14<br>C<br>COX5B<br>UBE3B<br>GMNN<br>PLK4<br>GAS6<br>AHRR<br>TRIOBP<br>RNFT2<br>FAM122<br>A<br>COX5B<br>GALR2<br>FAM46B<br>S100A13<br>TRIP13<br>CDT1<br>MASTL<br>MCM10<br>RNFT2<br>PLK3<br>SFRP1<br>RACGA<br>P1<br>FAM46B<br>S100A13<br>PFKFB2 | SLC4A1<br>1<br>BLM<br>C1ORF6<br>3<br>SMPD1<br>EID1<br>MOD2<br>FDXR<br>OGG1<br>AHRR<br>PFKFB2<br>SH3BGR<br>L<br>TRIM13<br>RPS6KA<br>3<br>GAS6<br>ABCC13<br>AURKB<br>CLIC6<br>CSR2P2B<br>P<br>CTPS1<br>DEPDC1<br>B<br>PCP4<br>PTGER3<br>SAC3D1<br>SFXN2<br>SLC39A<br>8<br>UBE3B<br>FAM122<br>A<br>COX5B<br>GALR2<br>FAM46B<br>S100A13<br>TRIP13<br>CDT1<br>MASTL<br>MCM10<br>RNFT2<br>PLK3<br>SFRP1<br>RACGA<br>P1<br>ARL3<br>CENPA |
|--|--|----------------------------------------------------------------------------------------------------------------------------------------------|-------------------------------------------------------------------------------------------------------------------------------------------------------------------------------------------------------------------------------------------------------------------------------------------------------------------------------------------------------------------------------------------------------------------------------------------------------------------------|--------------------------------------------------------------------------------------------------------------------|------------------------------------------------------------------------------------------|---------------------------------------------------------------------------------------------------------------------------------------------------------------------------------|--|--|----------------------------------------------------------------------------------------------------------------------------------------------------------------------------------------------------------------------------------------------------------------------------------------------------------------------------------------------------------------------------------------------------------------------------------------------------------------------------------------------------------------------------------------------------------------------------------------------------------------------------------------------------------------------|-----------------------------------------------------------------------------------------------------------------------------------------------------------------------------------------------------------------------------------------------------------------------------------------------------------------------------------------------------------------------------------------------------------------------------------------------------------------------------------|-----------------------------------------------------------------------------------------------------------------------------------------------------------------------------------------------------------------------------------------------------------------------------------------------------------------------------------------------------------------------------------------------------------------------------------|

|  |  |  |                                                                                                                                                                                                                                                                                                                                                                                                                                                                                   |  |  |  |  |  |                                                                                                                                                                                              |                                                                                                                                                                                                                                                                                                                                                                                                                    |                                                                                                                                                                                                                                                                                                                   |
|--|--|--|-----------------------------------------------------------------------------------------------------------------------------------------------------------------------------------------------------------------------------------------------------------------------------------------------------------------------------------------------------------------------------------------------------------------------------------------------------------------------------------|--|--|--|--|--|----------------------------------------------------------------------------------------------------------------------------------------------------------------------------------------------|--------------------------------------------------------------------------------------------------------------------------------------------------------------------------------------------------------------------------------------------------------------------------------------------------------------------------------------------------------------------------------------------------------------------|-------------------------------------------------------------------------------------------------------------------------------------------------------------------------------------------------------------------------------------------------------------------------------------------------------------------|
|  |  |  | TMEM97<br>RACGAP1<br>GNMT<br>CMBL<br>SFRP1<br>MITF<br>CAMKK2<br>PPP2R2C<br>MAP7<br>MYBL2<br>SLC6A14<br>CXCL11<br>PPARGC1A<br>FOXO1<br>ALOX15B<br>AMACR<br>RNF103<br>OLFM1<br>CHEK1<br>PDZD2<br>S100A9<br>UGT2B7<br>CYP3A4<br>SLC2A4<br>HPGD<br>CKS1B<br>GBP1<br>CDC42EP3<br>ITPK1<br>ID1<br>TMPRSS2<br>BCAS1<br>PPL<br>SAA2<br>SQLE<br>MT1L<br>KLK2<br>H6PD<br>HSD11B1<br>ALPK3<br>HHIPL2<br>STAT5A<br>PSMD6<br>DENND5A<br>MPHOSPH9<br>PLXNA2<br>CDT1<br>MASTL<br>MCM10<br>TBC1D1 |  |  |  |  |  | TSKU<br>HIVEP1<br>PBK<br>TRIP13<br>ARL3<br>CENPA<br>FBXO5<br>GINS2<br>KIF11<br>KIF15<br>NCAPD2<br>PLOD1<br>PRIM1<br>TACC3<br>UBE2T<br>RACGA<br>P1<br>RNFT2<br>ECT2<br>VNN1<br>CASP2<br>ITGA6 | SH3BGR<br>L<br>TRIM13<br>ARL3<br>CENPA<br>FBXO5<br>GINS2<br>KIF11<br>KIF15<br>NCAPD2<br>PLOD1<br>PRIM1<br>TACC3<br>UBE2T<br>RGL1<br>SLC39A<br>4<br>ETFB<br>ECT2<br>TSKU<br>PBK<br>CBFA2T<br>3<br>KCNJ5<br>EID1<br>PLK3<br>CBR1<br>IGFBP2<br>CHEK1<br>NRTN<br>IER5L<br>MLPH<br>HIVEP1<br>PON1<br>SFRP1<br>MSMB<br>ADAMT<br>S9<br>SH3RF1<br>PGR<br>ITGA6<br>CKS1B<br>CDC20<br>SMPD1<br>CA2<br>CYTH1<br>VNN1<br>AURKA | FBXO5<br>GINS2<br>KIF11<br>KIF15<br>NCAPD2<br>PLOD1<br>PRIM1<br>TACC3<br>UBE2T<br>TSKU<br>CYP2S1<br>ERBB2<br>PBK<br>ETFB<br>RGL1<br>SLC39A<br>4<br>ECT2<br>TRIOBP<br>CBR1<br>MCM6<br>MCM7<br>CYTH1<br>WISP2<br>PPP1R14<br>C<br>IER5L<br>GMNN<br>PLK4<br>SH3RF1<br>HIVEP1<br>PGR<br>NRTN<br>CKS1B<br>CDC20<br>VNN1 |
|--|--|--|-----------------------------------------------------------------------------------------------------------------------------------------------------------------------------------------------------------------------------------------------------------------------------------------------------------------------------------------------------------------------------------------------------------------------------------------------------------------------------------|--|--|--|--|--|----------------------------------------------------------------------------------------------------------------------------------------------------------------------------------------------|--------------------------------------------------------------------------------------------------------------------------------------------------------------------------------------------------------------------------------------------------------------------------------------------------------------------------------------------------------------------------------------------------------------------|-------------------------------------------------------------------------------------------------------------------------------------------------------------------------------------------------------------------------------------------------------------------------------------------------------------------|

|                       |                                                                                                                                                                                                                                                |                                                                                                                                                                                                                            |                                                                                                                                                                                                                                                   |                                                                                                                                                                                                                         |                                                                                                                                                                                                                 |                                                                                                                                                                                                                      |                                                                                                                                                                                                               |                                                                                                                                                                                                          |                                                                                                                                                                                        |                                                                                                                                                                                        |                                                                                                                                                                                               |
|-----------------------|------------------------------------------------------------------------------------------------------------------------------------------------------------------------------------------------------------------------------------------------|----------------------------------------------------------------------------------------------------------------------------------------------------------------------------------------------------------------------------|---------------------------------------------------------------------------------------------------------------------------------------------------------------------------------------------------------------------------------------------------|-------------------------------------------------------------------------------------------------------------------------------------------------------------------------------------------------------------------------|-----------------------------------------------------------------------------------------------------------------------------------------------------------------------------------------------------------------|----------------------------------------------------------------------------------------------------------------------------------------------------------------------------------------------------------------------|---------------------------------------------------------------------------------------------------------------------------------------------------------------------------------------------------------------|----------------------------------------------------------------------------------------------------------------------------------------------------------------------------------------------------------|----------------------------------------------------------------------------------------------------------------------------------------------------------------------------------------|----------------------------------------------------------------------------------------------------------------------------------------------------------------------------------------|-----------------------------------------------------------------------------------------------------------------------------------------------------------------------------------------------|
|                       |                                                                                                                                                                                                                                                |                                                                                                                                                                                                                            | CA2<br>ST3GAL1<br>GPRC5A<br>OLFML3<br>DLX4<br>RPS6KA3<br>TACC1<br>ABAT<br>ERMP1<br>MSX2<br>CENPN<br>PDSSB<br>SOCS2<br>SHBG<br>PTGER4<br>SFTPB<br>SCGB1D2<br>SCNN1A<br>HMMR<br>BRMS1<br>CITED2<br>FAM49A<br>UBE2C<br>TFF3<br>ITGAM<br>GGH<br>STMN1 |                                                                                                                                                                                                                         |                                                                                                                                                                                                                 |                                                                                                                                                                                                                      |                                                                                                                                                                                                               |                                                                                                                                                                                                          |                                                                                                                                                                                        |                                                                                                                                                                                        |                                                                                                                                                                                               |
| Downregulated<br>mRNA | NSF<br>SESN1<br>HIG2<br>SLTM<br>ZBTB43<br>MYNN<br>ADORA2B<br>CDCA4<br>CENPJ<br>DNAJC9<br>DONSON<br>HAUS8<br>MCMBP<br>NUP155<br>PARP2<br>RMI1<br>SCARA3<br>SLC16A14<br>SUV39H2<br>TMEM194A<br>PPIH<br>CTSL2<br>GPR19<br>LFNG<br>MIR20B<br>NUP54 | TMSB15A<br>MYNN<br>C9ORF40<br>ADORA2B<br>CDCA4<br>CENPJ<br>DNAJC9<br>DONSON<br>HAUS8<br>MCMBP<br>NUP155<br>PARP2<br>RMI1<br>SCARA3<br>SLC16A14<br>SUV39H2<br>TMEM194A<br>PPIH<br>CTSL2<br>GPR19<br>LFNG<br>MIR20B<br>NUP54 | ADORA2B<br>CDCA4<br>CENPJ<br>DNAJC9<br>DONSON<br>HAUS8<br>MCMBP<br>NUP155<br>PARP2<br>RMI1<br>SCARA3<br>SLC16A14<br>SUV39H2<br>TMSB15A<br>MYNN<br>C9ORF40<br>TMEM194A<br>MAST4<br>MSH5<br>TREX1<br>CTSL2<br>GPR19<br>LFNG                         | MYNN<br>TMSB15A<br>NOP56<br>ADORA2B<br>CDCA4<br>CENPJ<br>DNAJC9<br>DONSON<br>HAUS8<br>MCMBP<br>NUP155<br>PARP2<br>RMI1<br>SCARA3<br>SLC16A14<br>SUV39H2<br>C9ORF40<br>PPIH<br>HIG2<br>TMEM194A<br>LBR<br>SLTM<br>ZBTB43 | SESN1<br>MYNN<br>HIG2<br>SLTM<br>ZBTB43<br>AKR1C3<br>TRAF5<br>ADORA2B<br>CDCA4<br>CENPJ<br>DNAJC9<br>DONSON<br>HAUS8<br>MCMBP<br>NUP155<br>PARP2<br>RMI1<br>SCARA3<br>SLC16A14<br>SUV39H2<br>TMSB15A<br>CAPRIN1 | SESN1<br>GEMIN4<br>RPS19<br>NAP1L1<br>TNPO2<br>NME2<br>ASPH<br>NSF<br>ADORA2B<br>CDCA4<br>CENPJ<br>DNAJC9<br>DONSON<br>HAUS8<br>MCMBP<br>NUP155<br>PARP2<br>RMI1<br>SCARA3<br>SLC16A14<br>SUV39H2<br>MYNN<br>TMSB15A | ADAM19<br>CCL5<br>NOP56<br>CAPRIN1<br>TRAF5<br>SDC4<br>TBL1XR1<br>LGALS1<br>C9ORF40<br>UBE2M<br>FKBP5<br>NPM1<br>CXCL10<br>SAP18<br>TNFRSF10B<br>B<br>CCDC93<br>STX1A<br>HK2<br>DEK<br>H1FX<br>HIG2<br>ZFAND5 | ADAM19<br>CCL5<br>NOP56<br>CAPRIN1<br>TRAF5<br>SDC4<br>TBL1XR1<br>LGALS1<br>C9ORF40<br>UBE2M<br>FKBP5<br>NPM1<br>CXCL10<br>SAP18<br>TNFRSF10B<br>STX1A<br>HK2<br>DEK<br>H1FX<br>HIG2<br>ZFAND5<br>NAP1L1 | DMXL1<br>OLFML1<br>TUBGCP<br>3<br>TBC1D9<br>C9ORF4<br>1<br>APT<br>RSBN1<br>TEFM<br>HIG2<br>MAPK8<br>ADAM1<br>9<br>SDC4<br>OSBP2<br>GSS<br>DEK<br>STEAP1<br>MAN1A<br>2<br>YPEL5<br>LRP6 | DMXL1<br>OLFML1<br>TUBGCP<br>3<br>TBC1D9<br>C9ORF4<br>1<br>APT<br>RSBN1<br>TEFM<br>HIG2<br>GSS<br>MAPK8<br>LRP6<br>YPEL5<br>SDC4<br>STEAP1<br>OSBP2<br>DEK<br>ADAM1<br>9<br>MAN1A<br>2 | DMXL1<br>OLFML1<br>TUBGCP<br>3<br>APT<br>RSBN1<br>TBC1D9<br>C9ORF4<br>1<br>TEFM<br>LRP6<br>ADAM1<br>9<br>MAPK8<br>HIG2<br>OSBP2<br>SDC4<br>ABCA13<br>ABCC13<br>TMEM5<br>9L<br>YPEL5<br>STEAP1 |

|  |                                                                      |                                                                                                                                                                                                                                                                                                                                  |                                                                                                                                                                                                                                                                                                                                                                                                                                                           |                                                                                                                                                                                                                                                                                                                                                                                          |                                                                                                                                                                                                                                                                                                                                       |                                                                                                                                                                                                                                                                                                     |                                                                                                                          |                                                                                                   |                                                                                                                                                                                                                                                                                                                                                                                                                                                       |                                                                                                                                                                                                                                                                                                                                                                                                                       |                                                                                                                                                                                                                                                                                                                                                                                                                                                   |
|--|----------------------------------------------------------------------|----------------------------------------------------------------------------------------------------------------------------------------------------------------------------------------------------------------------------------------------------------------------------------------------------------------------------------|-----------------------------------------------------------------------------------------------------------------------------------------------------------------------------------------------------------------------------------------------------------------------------------------------------------------------------------------------------------------------------------------------------------------------------------------------------------|------------------------------------------------------------------------------------------------------------------------------------------------------------------------------------------------------------------------------------------------------------------------------------------------------------------------------------------------------------------------------------------|---------------------------------------------------------------------------------------------------------------------------------------------------------------------------------------------------------------------------------------------------------------------------------------------------------------------------------------|-----------------------------------------------------------------------------------------------------------------------------------------------------------------------------------------------------------------------------------------------------------------------------------------------------|--------------------------------------------------------------------------------------------------------------------------|---------------------------------------------------------------------------------------------------|-------------------------------------------------------------------------------------------------------------------------------------------------------------------------------------------------------------------------------------------------------------------------------------------------------------------------------------------------------------------------------------------------------------------------------------------------------|-----------------------------------------------------------------------------------------------------------------------------------------------------------------------------------------------------------------------------------------------------------------------------------------------------------------------------------------------------------------------------------------------------------------------|---------------------------------------------------------------------------------------------------------------------------------------------------------------------------------------------------------------------------------------------------------------------------------------------------------------------------------------------------------------------------------------------------------------------------------------------------|
|  | MAST4<br>MSH5<br>TREX1<br>NOP56<br>PPIH<br>TNPO2<br>RPS19<br>C9ORF40 | PRR16<br>SP4<br>MAST4<br>MSH5<br>TREX1<br>CBX2<br>GART<br>LBR<br>SESN1<br>RPS19<br>ASPH<br>TNPO2<br>GEMIN4<br>NAP1L1<br>DEK<br>SLTM<br>ZBTB43<br>HIG2<br>NOP56<br>POC1A<br>EFNB2<br>NME2<br>TANC1<br>NDE1<br>BARD1<br>TSPAN5<br>NPM1<br>TAOK3<br>INCENP<br>GSS<br>CXCR7<br>TRIM16<br>HSPA6<br>TRAF5<br>GPLD1<br>DNMT1<br>CAPRIN1 | MIR20B<br>NUP54<br>PRR16<br>SP4<br>GART<br>NOP56<br>CBX2<br>RPS19<br>SEC16A<br>PPIH<br>TBC1D9<br>GEMIN4<br>HPSS<br>SESN1<br>AKR1C3<br>YPEL5<br>ASPH<br>MAPK8<br>HSPA6<br>PTPRO<br>EFNB2<br>PLEC<br>ZBTB10<br>HIG2<br>GPLD1<br>SLC14A1<br>ABCC5<br>SLTM<br>ZBTB43<br>GSS<br>KIAA0256<br>MXD4<br>MYH6<br>TCF25<br>UGT1A3<br>BARD1<br>CD58<br>LBR<br>WNT7A<br>HEATR3<br>L1CAM<br>CDK2AP2<br>NDE1<br>DEK<br>NPM1<br>POC1A<br>ELAC2<br>TANC1<br>TRIM16<br>TPM1 | CTSL2<br>GPR19<br>LFNG<br>MIR20B<br>NUP54<br>PRR16<br>SP4<br>SESN1<br>MAST4<br>MSH5<br>TREX1<br>CTSL2<br>GPR19<br>LFNG<br>MIR20B<br>NUP54<br>PRR16<br>GART<br>GSS<br>ASPH<br>TRAF5<br>EFNB2<br>RPS19<br>TNPO2<br>HSPA6<br>DEK<br>GEMIN4<br>POC1A<br>GPLD1<br>DIO2<br>SEC16A<br>TANC1<br>CAPRIN1<br>NAP1L1<br>NDE1<br>AKR1C3<br>NPM1<br>DHFR<br>ABCC5<br>TPM1<br>BARD1<br>ERCC2<br>TBC1D9 | TAOK3<br>WDR77<br>NAP1L1<br>NSF<br>TNPO2<br>MAST4<br>MSH5<br>TREX1<br>CTSL2<br>GPR19<br>LFNG<br>MIR20B<br>NUP54<br>PRR16<br>SP4<br>PPIH<br>GART<br>TMEM194<br>A<br>C9ORF40<br>RPS19<br>EFNB2<br>GEMIN4<br>CBX2<br>ASPH<br>ETS1<br>GART<br>NME2<br>ZBTB10<br>PPIH<br>TSPAN5<br>LBR<br>NDE1<br>TOB1<br>POC1A<br>TANC1<br>BARD1<br>NOP56 | MBNL2<br>LBR<br>C9ORF40<br>MAST4<br>MSH5<br>TREX1<br>CXCR7<br>CTSL2<br>GPR19<br>LFNG<br>MIR20B<br>NUP54<br>PRR16<br>SP4<br>PPIH<br>GART<br>CBX2<br>TMEM194<br>A<br>SLTM<br>ZBTB43<br>HIG2<br>ETS1<br>NDE1<br>POC1A<br>ZBTB10<br>TANC1<br>TSPAN5<br>OSR2<br>INCENP<br>EFNB2<br>BARD1<br>TPM1<br>NPM1 | NAP1L1<br>GPLD1<br>GART<br>KLF10<br>KLF10<br>TOB1<br>SOD1<br>TMEM194<br>A<br>TMSB15A<br>SEC16A<br>WWP2<br>MAPK8<br>CXCL2 | GPLD1<br>GART<br>KLF10<br>TOB1<br>SOD1<br>TMEM194A<br>TMSB15A<br>SEC16A<br>WWP2<br>MAPK8<br>CXCL2 | ITGAV<br>ARNT<br>CADPS2<br>CCDC41<br>FNIP2<br>GCA<br>GPT2<br>ITPKA<br>KCNJ10<br>KLHL14<br>PSD3<br>GPT2<br>SPIN3<br>STARD1<br>3<br>ZNF711<br>PGM2L1<br>LBR<br>INTU<br>PAQR3<br>QPCT<br>RNFT1<br>MBNL2<br>HK2<br>ABL1<br>HEATR3<br>AIM1<br>C17ORF<br>75<br>COG6<br>MITD1<br>PLSCR1<br>PRKAB2<br>VPS36<br>H1FX<br>ABCA13<br>ABCC13<br>TMEM5<br>9L<br>PCOLCE<br>2<br>SLC30A<br>1<br>ZBTB10<br>FTSJD1<br>GUF1<br>MAP4K4<br>TNFRSF<br>10B<br>RASA1<br>NCOA1 | ABCA13<br>ABCC13<br>TMEM5<br>9L<br>ITGAV<br>ARNT<br>CADPS2<br>CCDC41<br>FNIP2<br>GCA<br>GPT2<br>ITPKA<br>KCNJ10<br>KLHL14<br>PSD3<br>SPIN3<br>STARD1<br>3<br>ZNF711<br>PGM2L1<br>MBNL2<br>HEATR3<br>AIM1<br>C17ORF<br>75<br>COG6<br>MITD1<br>PLSCR1<br>PRKAB2<br>VPS36<br>INTU<br>PAQR3<br>QPCT<br>RNFT1<br>LBR<br>NCOA1<br>PCOLCE<br>2<br>FTSJD1<br>GUF1<br>HK2<br>EFNA3<br>ZBTB10<br>SLC30A<br>1<br>RASA1<br>MAP4K4 | GSS<br>MAN1A<br>2<br>DEK<br>MFAP4<br>EFNA3<br>ITGAV<br>HK2<br>TNFRSF<br>10B<br>SYMPK<br>ABL1<br>MBNL2<br>ARNT<br>CADPS2<br>CCDC41<br>FNIP2<br>GCA<br>GPT2<br>ITPKA<br>KCNJ10<br>KLHL14<br>PSD3<br>SPIN3<br>STARD1<br>3<br>ZNF711<br>LBR<br>PGM2L1<br>HEATR3<br>AIM1<br>C17ORF<br>75<br>COG6<br>MITD1<br>PLSCR1<br>PRKAB2<br>VPS36<br>INTU<br>PAQR3<br>QPCT<br>RNFT1<br>PCOLCE<br>2<br>FTSJD1<br>GUF1<br>H1FX<br>PDZK1<br>FTSJD1<br>GUF1<br>MAP4K4 |
|--|----------------------------------------------------------------------|----------------------------------------------------------------------------------------------------------------------------------------------------------------------------------------------------------------------------------------------------------------------------------------------------------------------------------|-----------------------------------------------------------------------------------------------------------------------------------------------------------------------------------------------------------------------------------------------------------------------------------------------------------------------------------------------------------------------------------------------------------------------------------------------------------|------------------------------------------------------------------------------------------------------------------------------------------------------------------------------------------------------------------------------------------------------------------------------------------------------------------------------------------------------------------------------------------|---------------------------------------------------------------------------------------------------------------------------------------------------------------------------------------------------------------------------------------------------------------------------------------------------------------------------------------|-----------------------------------------------------------------------------------------------------------------------------------------------------------------------------------------------------------------------------------------------------------------------------------------------------|--------------------------------------------------------------------------------------------------------------------------|---------------------------------------------------------------------------------------------------|-------------------------------------------------------------------------------------------------------------------------------------------------------------------------------------------------------------------------------------------------------------------------------------------------------------------------------------------------------------------------------------------------------------------------------------------------------|-----------------------------------------------------------------------------------------------------------------------------------------------------------------------------------------------------------------------------------------------------------------------------------------------------------------------------------------------------------------------------------------------------------------------|---------------------------------------------------------------------------------------------------------------------------------------------------------------------------------------------------------------------------------------------------------------------------------------------------------------------------------------------------------------------------------------------------------------------------------------------------|

|  |  |  |                                                                                                                                                                                                                                                                                                                  |  |  |  |  |  |                                                                                                                                                                                                                                                                                                                                                                                                                                              |                                                                                                                                                                                                                                                                                                                                                                                                                                             |                                                                                                                                                                                                                                                                                                                                                                                                                                         |
|--|--|--|------------------------------------------------------------------------------------------------------------------------------------------------------------------------------------------------------------------------------------------------------------------------------------------------------------------|--|--|--|--|--|----------------------------------------------------------------------------------------------------------------------------------------------------------------------------------------------------------------------------------------------------------------------------------------------------------------------------------------------------------------------------------------------------------------------------------------------|---------------------------------------------------------------------------------------------------------------------------------------------------------------------------------------------------------------------------------------------------------------------------------------------------------------------------------------------------------------------------------------------------------------------------------------------|-----------------------------------------------------------------------------------------------------------------------------------------------------------------------------------------------------------------------------------------------------------------------------------------------------------------------------------------------------------------------------------------------------------------------------------------|
|  |  |  | CXCR7<br>TRAF5<br>RPRM<br>INCENP<br>KLF10<br>ERCC2<br>SOX4<br>WDR77<br>PRIMA1<br>OSBP2<br>DNMT1<br>RAD18<br>SPATA5<br>CAPRIN1<br>NCOA1<br>STEAP1<br>CXCL2<br>TGFB2<br>IL24<br>DSC1<br>TAOK3<br>TNPO2<br>DIO2<br>OSR2<br>NAP1L1<br>HK2<br>HIST2H2BE<br>TSPAN5<br>CCL5<br>ARNT2<br>TRA2A<br>KRT23<br>NME2<br>MBNL2 |  |  |  |  |  | SH3D19<br>EVI2B<br>PHF14<br>DSPP<br>IVNS1A<br>BP<br>CXCL10<br>AADAT<br>CDKAL1<br>CEP70<br>DOCK4<br>EXOC6<br>TMEM1<br>17<br>ROCK2<br>ESM1<br>RAB20<br>FOXP1<br>NTN4<br>POLR3B<br>PRKD3<br>TTC27<br>WDR7<br>ZHX2<br>ZNRF3<br>FNDC3B<br>AKIRIN<br>1<br>BTBD11<br>COBLL1<br>DAB2<br>NADKD<br>1<br>RBM12<br>EFNA3<br>KRAS<br>NAV2<br>ADORA<br>2B<br>CDCA4<br>CENPJ<br>DNAJC9<br>DONSO<br>N<br>HAUS8<br>MCMBP<br>NUP155<br>PARP2<br>RMI1<br>SCARA3 | EVI2B<br>AADAT<br>CDKAL1<br>CEP70<br>DOCK4<br>EXOC6<br>TMEM1<br>17<br>SH3D19<br>MFAP4<br>IL15<br>PHF14<br>CXCL10<br>SYMPK<br>RAB20<br>DIAPH2<br>KRAS<br>IVNS1A<br>BP<br>MCL1<br>C9ORF4<br>0<br>FNDC3B<br>ROCK2<br>FOXP1<br>NTN4<br>POLR3B<br>PRKD3<br>TTC27<br>WDR7<br>ZHX2<br>ZNRF3<br>ESM1<br>SIAH1<br>PDZK1<br>AKIRIN<br>1<br>BTBD11<br>COBLL1<br>DAB2<br>NADKD<br>1<br>NAV2<br>RBM12<br>KIAA02<br>56<br>MXD4<br>MYH6<br>TCF25<br>UGT1A3 | SH3D19<br>RASA1<br>DSPP<br>NCOA1<br>ZBTB10<br>SLC30A<br>1<br>CXCL10<br>IL15<br>RAB20<br>PHF14<br>AADAT<br>CDKAL1<br>CEP70<br>DOCK4<br>EXOC6<br>TMEM1<br>17<br>FOXP1<br>NTN4<br>POLR3B<br>PRKD3<br>TTC27<br>WDR7<br>ZHX2<br>ZNRF3<br>ESM1<br>DIAPH2<br>ROCK2<br>IVNS1A<br>BP<br>FNDC3B<br>KRAS<br>AKIRIN<br>1<br>BTBD11<br>COBLL1<br>DAB2<br>NADKD<br>1<br>NAV2<br>MCL1<br>HPS5<br>DNMT1<br>C9ORF4<br>0<br>UBE2M<br>PACSIN<br>2<br>RBM12 |
|--|--|--|------------------------------------------------------------------------------------------------------------------------------------------------------------------------------------------------------------------------------------------------------------------------------------------------------------------|--|--|--|--|--|----------------------------------------------------------------------------------------------------------------------------------------------------------------------------------------------------------------------------------------------------------------------------------------------------------------------------------------------------------------------------------------------------------------------------------------------|---------------------------------------------------------------------------------------------------------------------------------------------------------------------------------------------------------------------------------------------------------------------------------------------------------------------------------------------------------------------------------------------------------------------------------------------|-----------------------------------------------------------------------------------------------------------------------------------------------------------------------------------------------------------------------------------------------------------------------------------------------------------------------------------------------------------------------------------------------------------------------------------------|

|  |  |  |  |  |  |  |  |  |                                                                                                                                                                                                                                                                                                                                                                                                    |                                                                                                                                                                                                                                                                                                                                                                                                                                                                                                                                                                                                                   |                                                                                                                                                                                                                                                                                                                                                                               |
|--|--|--|--|--|--|--|--|--|----------------------------------------------------------------------------------------------------------------------------------------------------------------------------------------------------------------------------------------------------------------------------------------------------------------------------------------------------------------------------------------------------|-------------------------------------------------------------------------------------------------------------------------------------------------------------------------------------------------------------------------------------------------------------------------------------------------------------------------------------------------------------------------------------------------------------------------------------------------------------------------------------------------------------------------------------------------------------------------------------------------------------------|-------------------------------------------------------------------------------------------------------------------------------------------------------------------------------------------------------------------------------------------------------------------------------------------------------------------------------------------------------------------------------|
|  |  |  |  |  |  |  |  |  | SLC16A14<br>SUV39H2<br>SIAH1<br>CUL4B<br>MFAP4<br>TAOK3<br>DNMT1<br>MTIF2<br>PACSIN2<br>HSPA5<br>AHRR<br>CLASP2<br>CREB3L2<br>IGF2BP3<br>PDGFC<br>RAB28<br>RALA<br>SNX24<br>TMEM139<br>MCL1<br>C9ORF40<br>SYMPK<br>CD74<br>IL1R1<br>BGLAP<br>CHST15<br>DRG2<br>FOXN3<br>IL15<br>WWC2<br>HPS5<br>KIAA0256<br>MXD4<br>MYH6<br>TCF25<br>UGT1A3<br>DIAPH2<br>RAR<br>PDZK1<br>TRAF5<br>TMEM121<br>EFNB2 | CYP1B1<br>WWC2<br>DNMT1<br>TMEM121<br>CUL4B<br>MTIF2<br>DSPP<br>TAOK3<br>PACSIN2<br>HPS5<br>WNT7A<br>CDK2AP2<br>FOXN3<br>AHRR<br>CLASP2<br>CREB3L2<br>IGF2BP3<br>PDGFC<br>RAB28<br>RALA<br>SNX24<br>TMEM139<br>HSPA5<br>MSI2<br>ADORA2B<br>CDCA4<br>CENPJ<br>DNAJC9<br>DONSON<br>HAUS8<br>MCMBP<br>NUP155<br>PARP2<br>RMI1<br>SCARA3<br>SLC16A14<br>SUV39H2<br>SIAH1<br>KIAA0256<br>MXD4<br>MYH6<br>TCF25<br>UGT1A3<br>CUL4B<br>HSPA5<br>AHRR<br>CLASP2<br>CREB3L2<br>IGF2BP3<br>PDGFC<br>RAB28<br>RALA<br>SNX24<br>TMEM139<br>MSI2<br>TMEM121<br>CDK2AP2<br>SLC16A14<br>SUV39H2<br>DRG2<br>OCLN<br>IL1R1<br>CD74 | ADORA2B<br>CDCA4<br>CENPJ<br>DNAJC9<br>DONSON<br>HAUS8<br>MCMBP<br>NUP155<br>PARP2<br>RMI1<br>SCARA3<br>SLC16A14<br>SUV39H2<br>SIAH1<br>KIAA0256<br>MXD4<br>MYH6<br>TCF25<br>UGT1A3<br>CUL4B<br>HSPA5<br>AHRR<br>CLASP2<br>CREB3L2<br>IGF2BP3<br>PDGFC<br>RAB28<br>RALA<br>SNX24<br>TMEM139<br>MSI2<br>TMEM121<br>CDK2AP2<br>TAOK3<br>WWC2<br>TRAF5<br>IL1R1<br>DRG2<br>BGLAP |
|--|--|--|--|--|--|--|--|--|----------------------------------------------------------------------------------------------------------------------------------------------------------------------------------------------------------------------------------------------------------------------------------------------------------------------------------------------------------------------------------------------------|-------------------------------------------------------------------------------------------------------------------------------------------------------------------------------------------------------------------------------------------------------------------------------------------------------------------------------------------------------------------------------------------------------------------------------------------------------------------------------------------------------------------------------------------------------------------------------------------------------------------|-------------------------------------------------------------------------------------------------------------------------------------------------------------------------------------------------------------------------------------------------------------------------------------------------------------------------------------------------------------------------------|

|  |  |  |  |  |  |  |  |  |                                                                |                                                                                                                                                                       |                                                                                                                             |
|--|--|--|--|--|--|--|--|--|----------------------------------------------------------------|-----------------------------------------------------------------------------------------------------------------------------------------------------------------------|-----------------------------------------------------------------------------------------------------------------------------|
|  |  |  |  |  |  |  |  |  | PDGFRL<br>TANC1<br>CDK2AP<br>2<br>RPS19<br>CAPRIN<br>1<br>TOB1 | UBE2M<br>BGLAP<br>CHST15<br>SRCRB4<br>D<br>HP<br>RARB<br>EFNB2<br>TRAF5<br>PDGFRL<br>ASAH1<br>ZFAND5<br>RPS19<br>WDR4<br>DIO2<br>CAPRIN<br>1<br>PLEC<br>TANC1<br>TOB1 | WNT7A<br>FOXP3<br>CAPRIN<br>1<br>CHST15<br>RARB<br>EFNB2<br>SRCRB4<br>D<br>TOB1<br>PDGFRL<br>TANC1<br>WDR4<br>RPS19<br>PLEC |
|--|--|--|--|--|--|--|--|--|----------------------------------------------------------------|-----------------------------------------------------------------------------------------------------------------------------------------------------------------------|-----------------------------------------------------------------------------------------------------------------------------|

2  
3  
4  
5  
6  
7  
8  
9  
10  
11  
12  
13  
14  
15  
16  
17  
18  
19  
20  
21

22  
23  
24

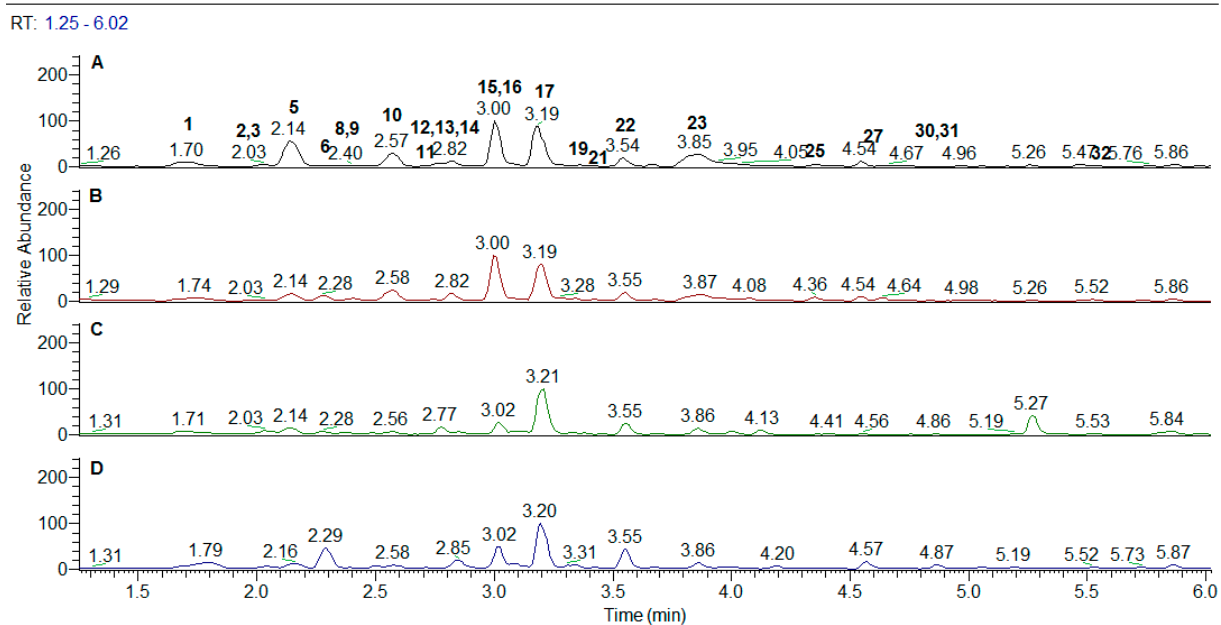

25  
26  
27  
28  
29

Figure S1. Extracted ion chromatogram of hydroxybenzoic and hydroxycinnamic acids and derivatives in negative ion mode of methanolic extracts from *Achillea wilhemsii* aerial parts (A), *A. allepica* aerial parts (B), *A. wilhemsii* roots (C), *A. allepica* roots (D) (for the compound numbers see Table 2).

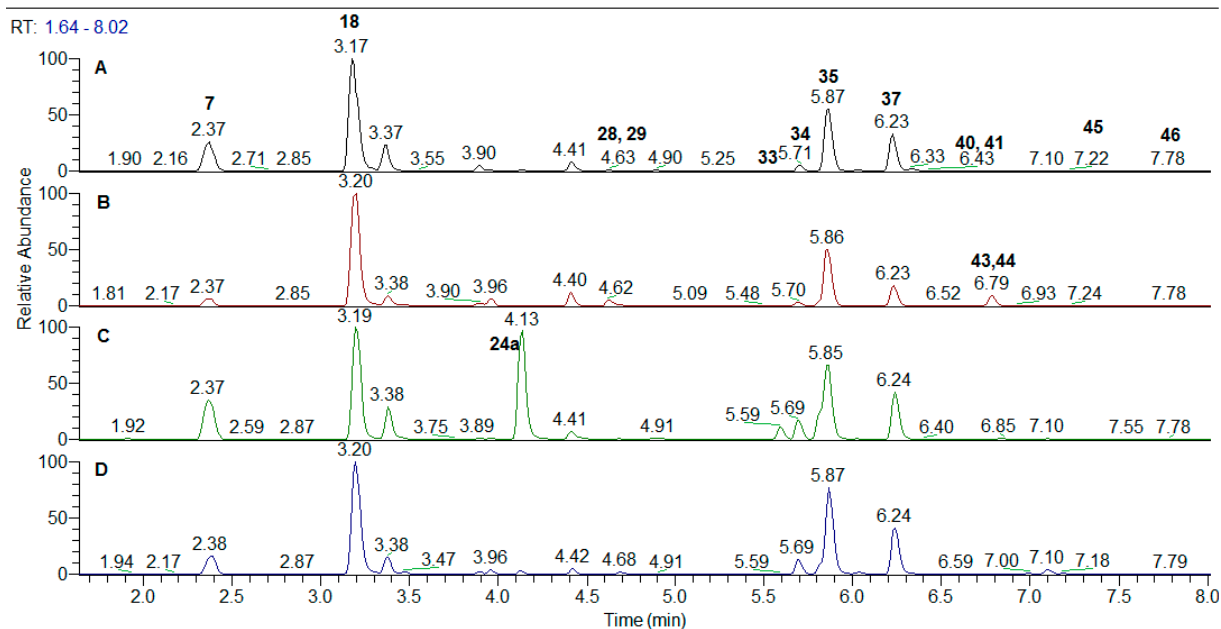

Figure S2. Extracted ion chromatogram of acylquinic acids in negative ion mode of methanolic extracts from *Achillea wilhemsii* aerial parts (A), *A. allepica* aerial parts (B), *A. wilhemsii* roots (C), *A. allepica* roots (D) (for the compound numbers see Table 2).

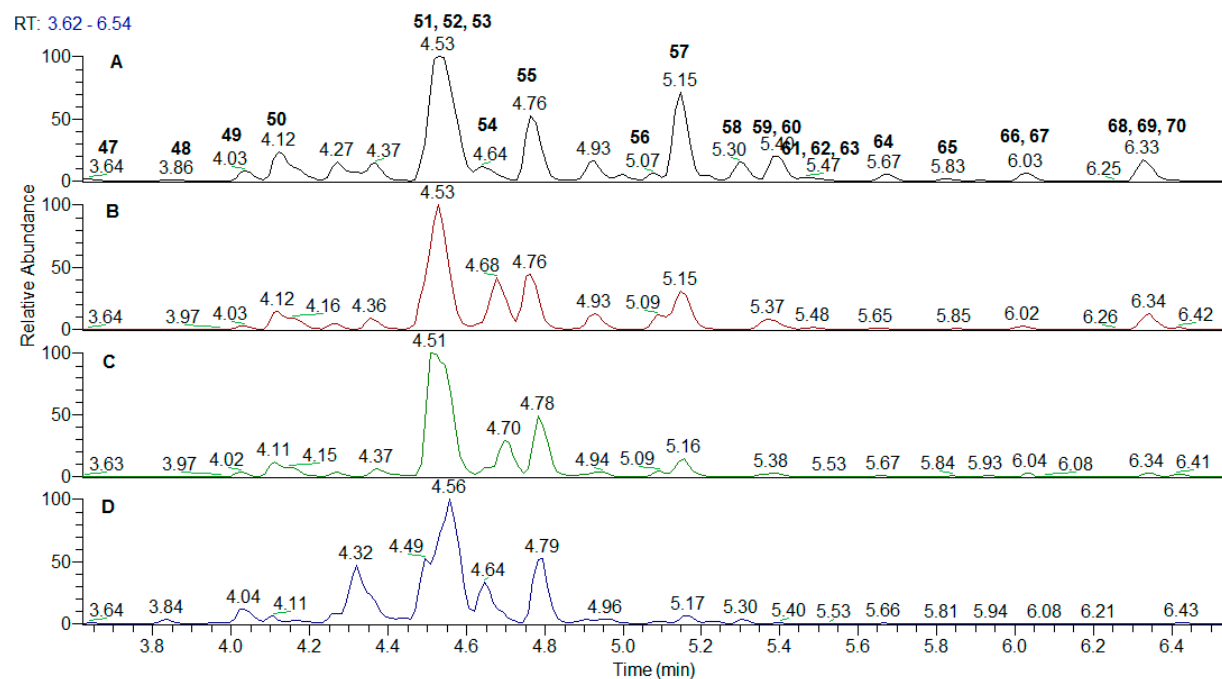

Figure S3. Extracted ion chromatogram of flavonoid glycosides in negative ion mode of methanolic extracts from *Achillea wilhemsii* aerial parts (A), *A. allepica* aerial parts (B), *A. wilhemsii* roots (C), *A. allepica* roots (D) (for the compound numbers see Table 2).

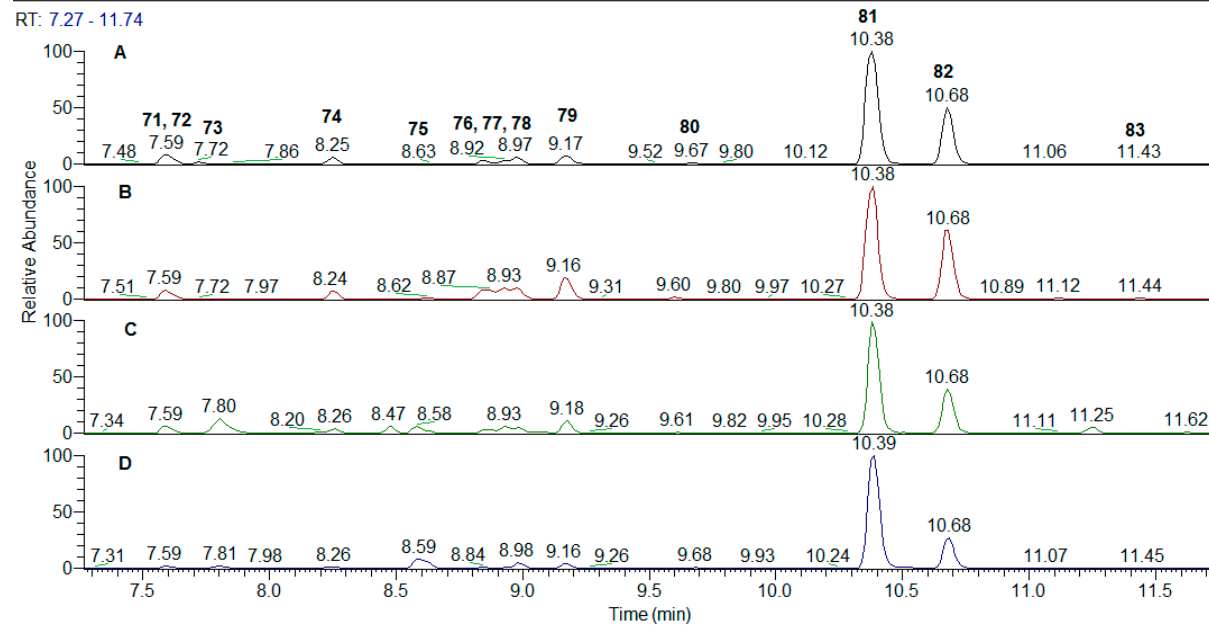

Figure S4. Extracted ion chromatogram of flavonoid aglycones in negative ion mode of methanolic extracts from *Achillea wilhemsii* aerial parts (A), *A. allepica* aerial parts (B), *A. wilhemsii* roots (C), *A. allepica* roots (D) (for the compound numbers see Table 2).

1: FTMS - p ESI d Full ms2 315.2180@hcd33.33 [50.0000-340.0000]

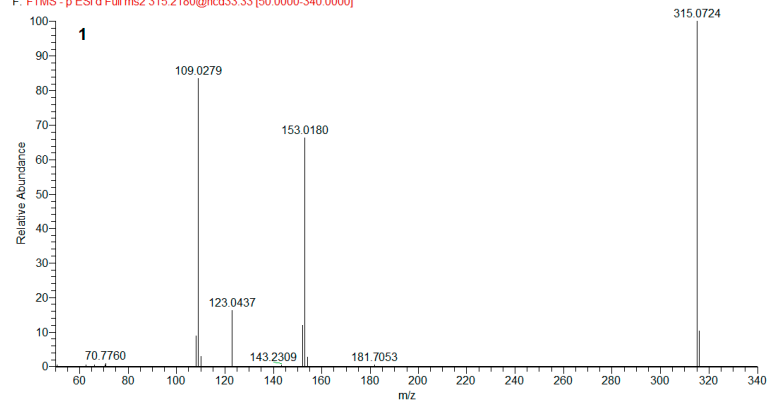

2: FTMS - p ESI d Full ms2 357.1562@hcd33.33 [50.0000-385.0000]

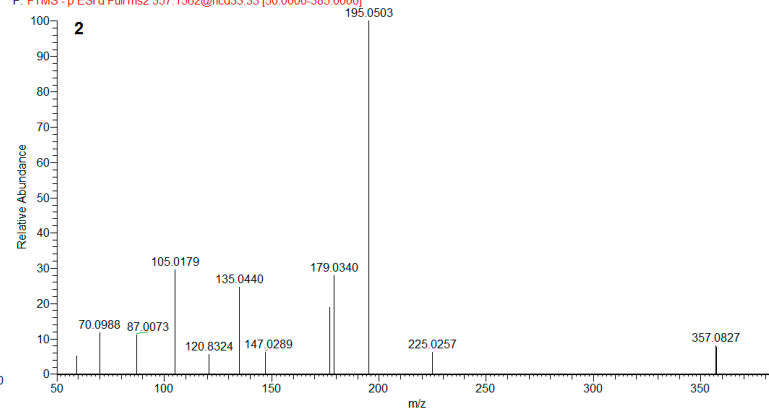

3: FTMS - p ESI d Full ms2 152.9950@hcd33.33 [50.0000-175.0000]

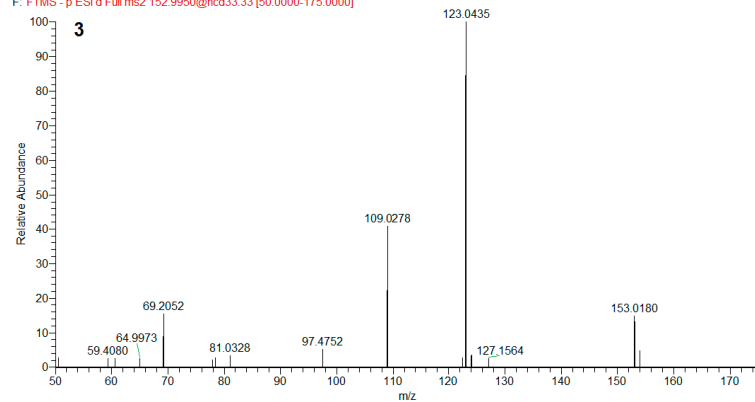

4: FTMS - p ESI d Full ms2 313.0569@hcd33.33 [50.0000-340.0000]

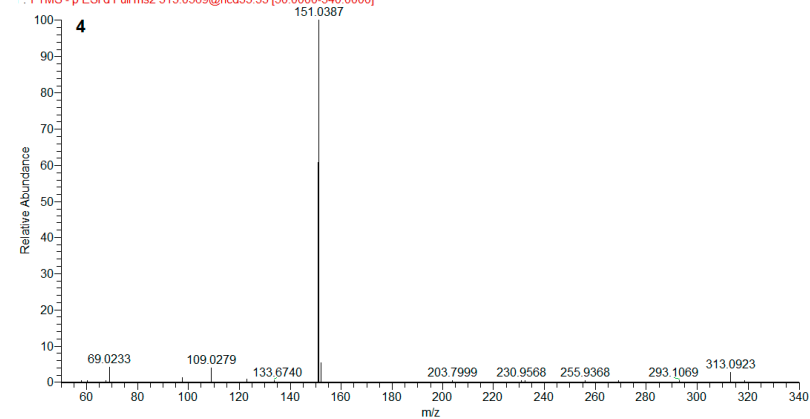

F: FTMS - p ESI d Full ms2 314.9880@hcd33.33 [50.0000-340.0000]

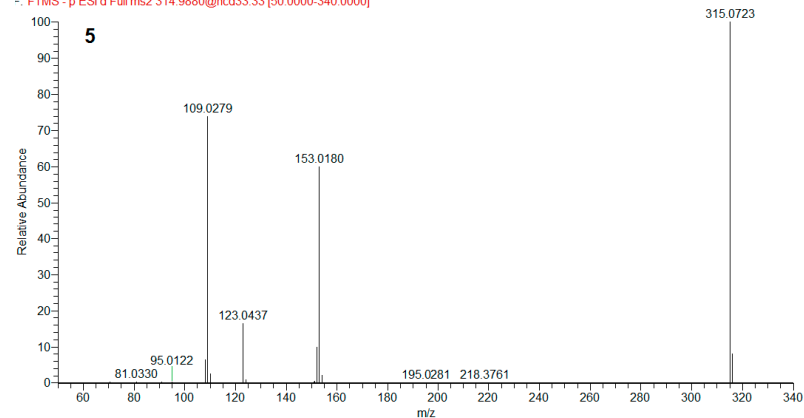

F: FTMS - p ESI d Full ms2 358.9753@hcd33.33 [50.0000-385.0000]

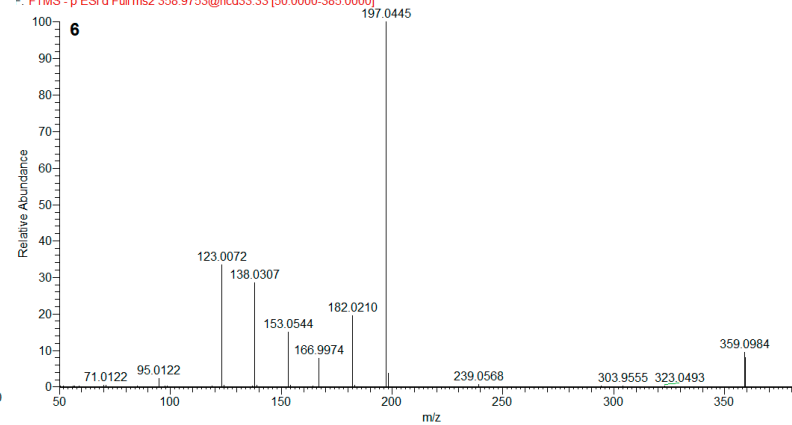

F: FTMS - p ESI d Full ms2 357.1562@hcd33.33 [50.0000-385.0000]

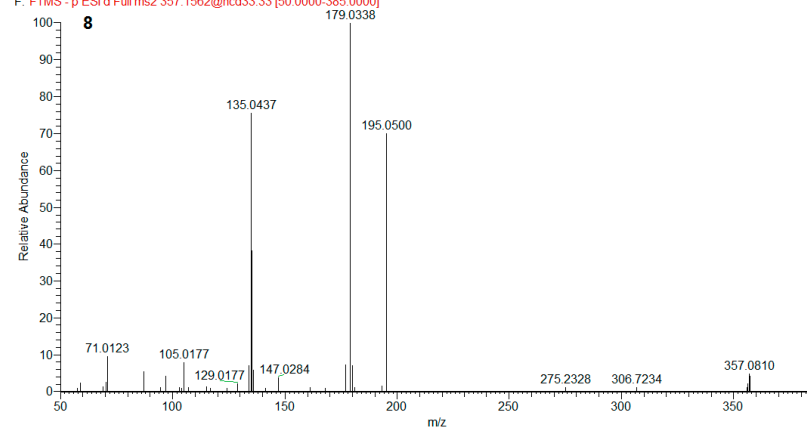

F: FTMS - p ESI d Full ms2 340.9843@hcd33.33 [50.0000-365.0000]

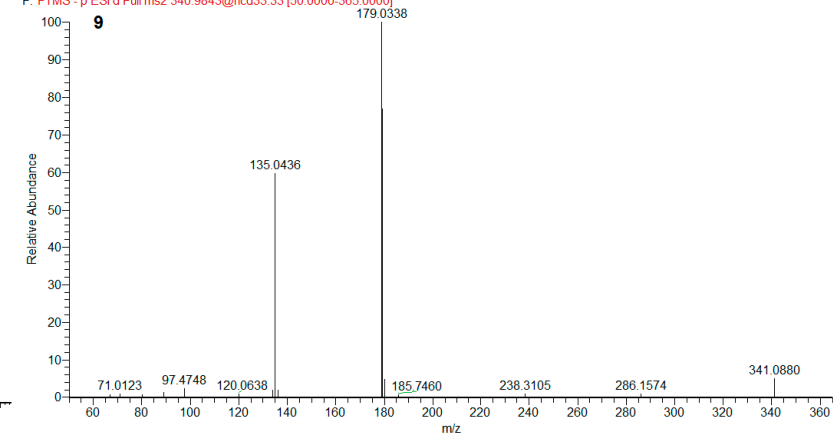

F: FTMS - p ESI d Full ms2 314.9880@hcd33.33 [50.0000-340.0000]

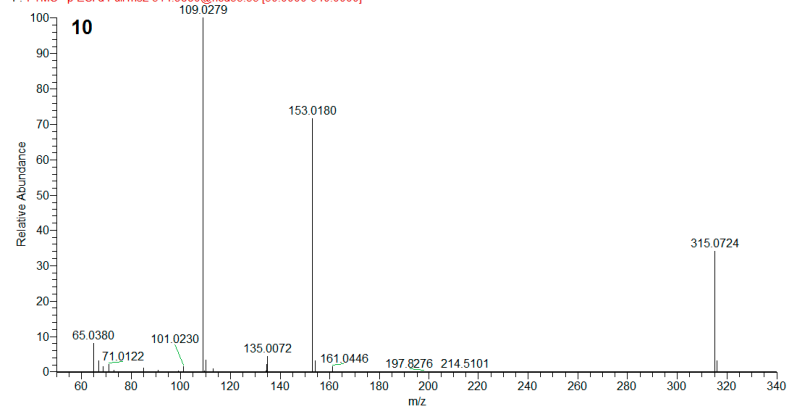

F: FTMS - p ESI d Full ms2 329.1246@hcd33.33 [50.0000-355.0000]

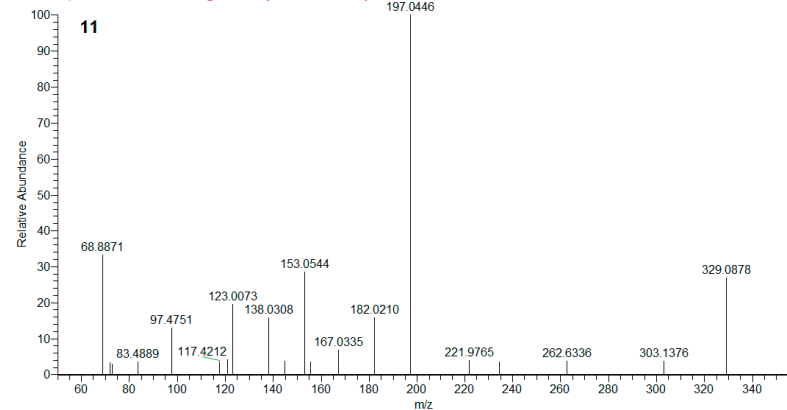

F: FTMS - p ESI d Full ms2 357.1562@hcd33.33 [50.0000-385.0000]

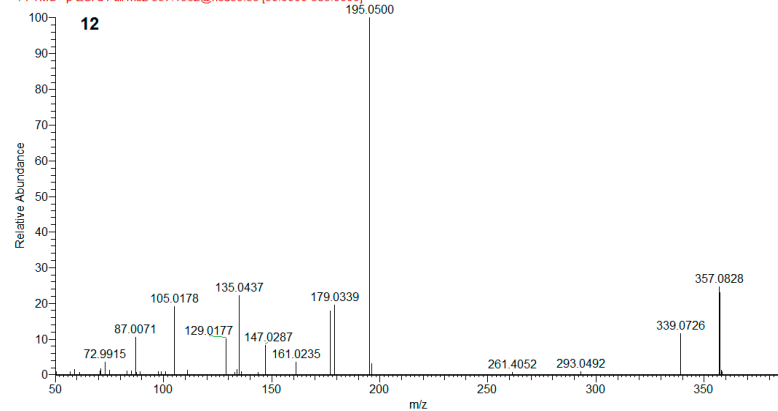

F: FTMS - p ESI d Full ms2 341.2126@hcd33.33 [50.0000-365.0000]

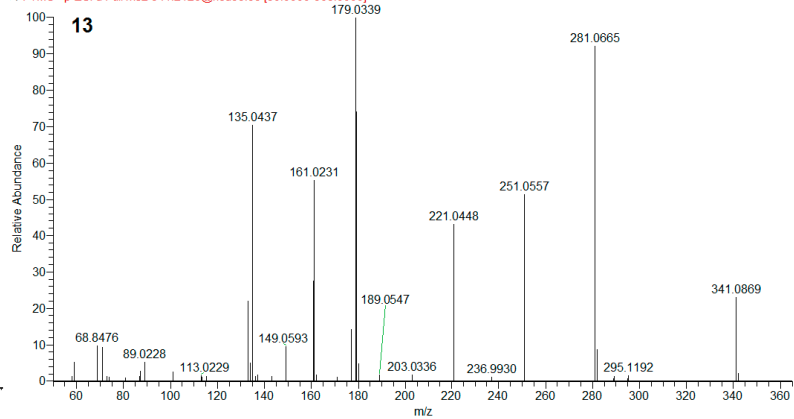

F: FTMS - p ESI d Full ms2 136.8620@hcd33.33 [50.0000-160.0000]

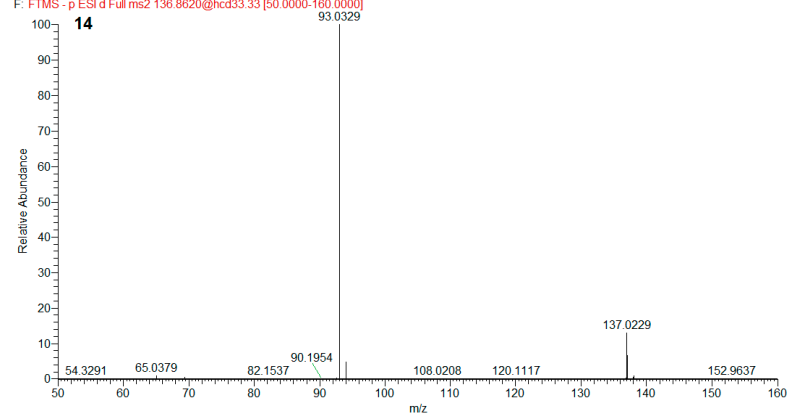

F: FTMS - p ESI d Full ms2 298.9763@hcd33.33 [50.0000-325.0000]

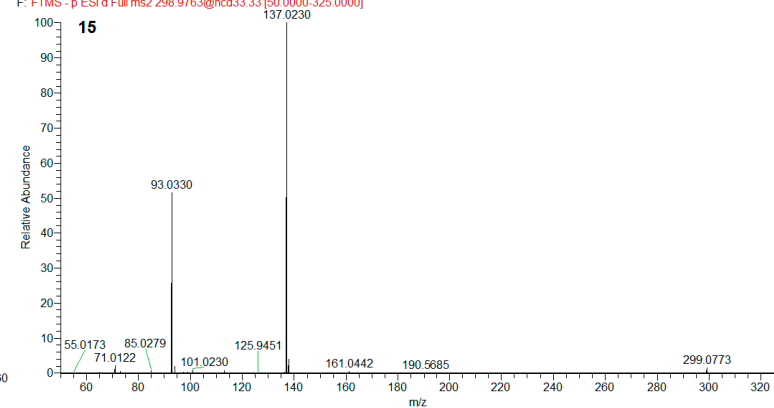

F: FTMS - p ESI d Full ms2 313.0569@hcd33.33 [50.0000-340.0000]

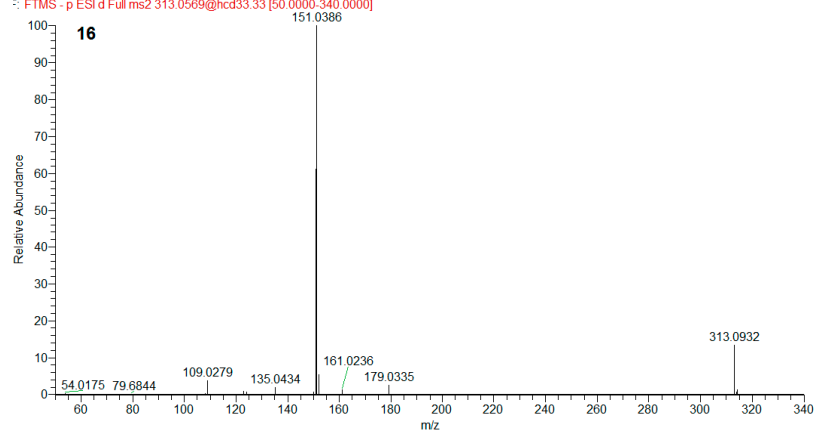

F: FTMS - p ESI d Full ms2 190.9274@hcd33.33 [50.0000-215.0000]

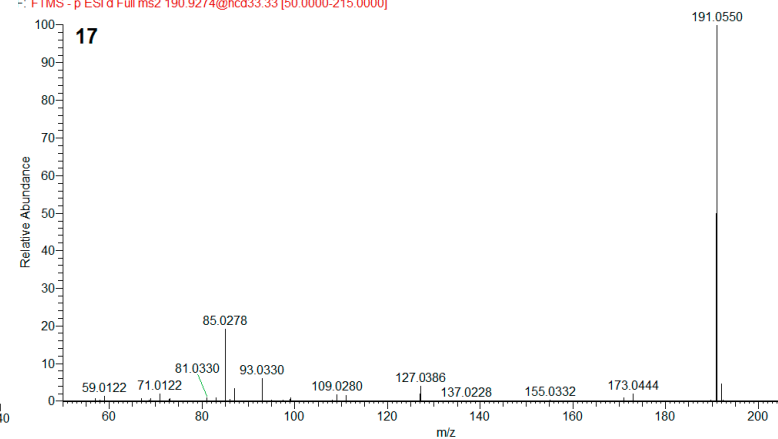

F: FTMS - p ESI'd Full ms2 163.0389@hcd33.33 [50.0000-185.0000]

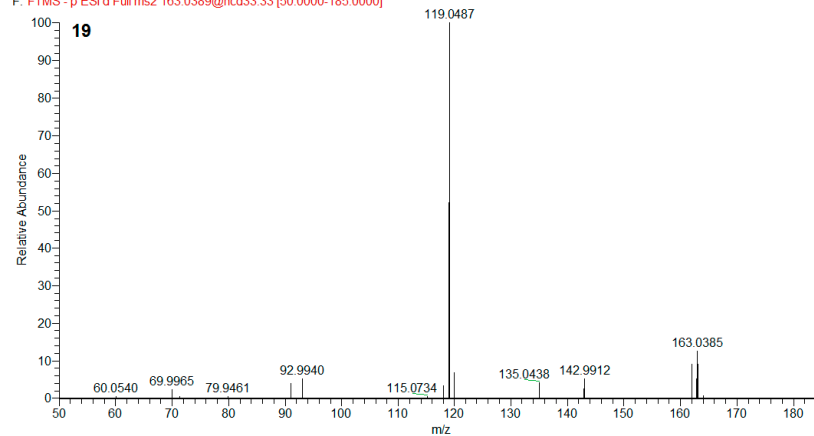

F: FTMS - p ESI'd Full ms2 151.0388@hcd33.33 [50.0000-175.0000]

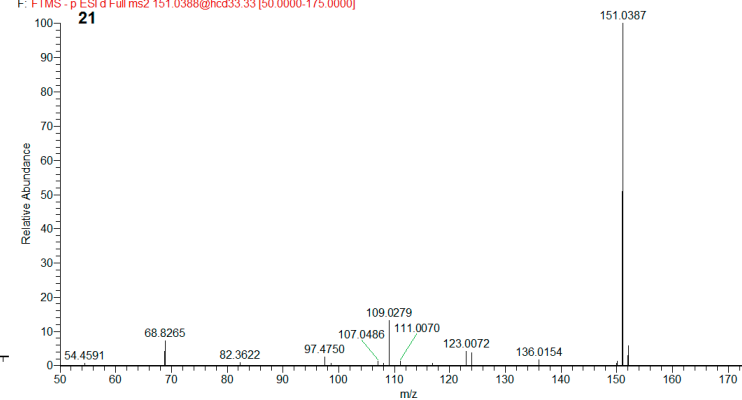

F: FTMS - p ESI'd Full ms2 179.0334@hcd33.33 [50.0000-200.0000]

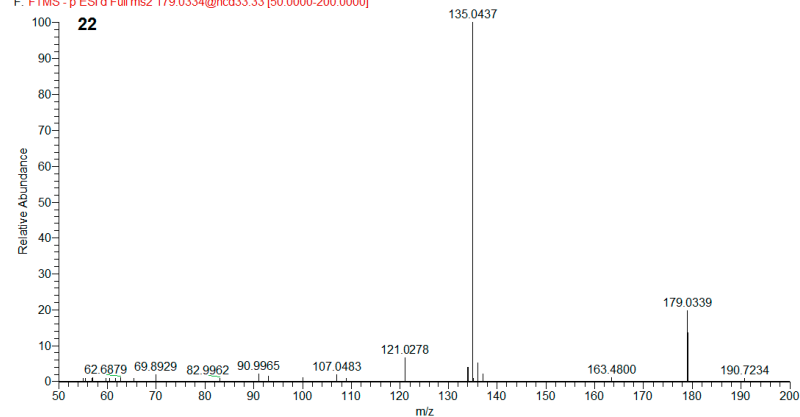

F: FTMS - p ESI'd Full ms2 152.9950@hcd33.33 [50.0000-175.0000]

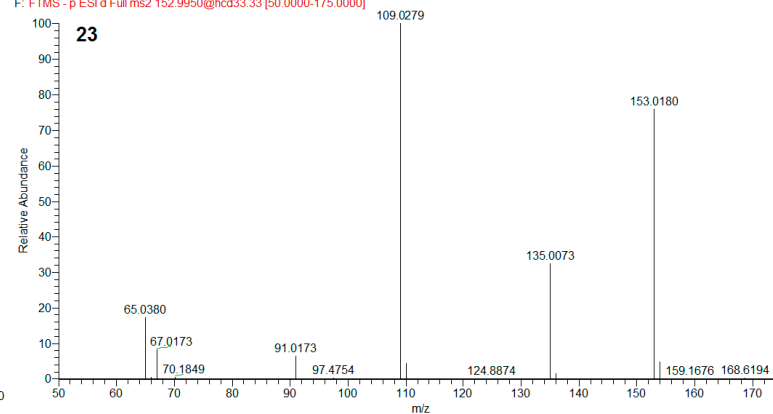

F: FTMS - p ESI d Full ms2 163.0389@hcd33.33 [50.0000-185.0000]

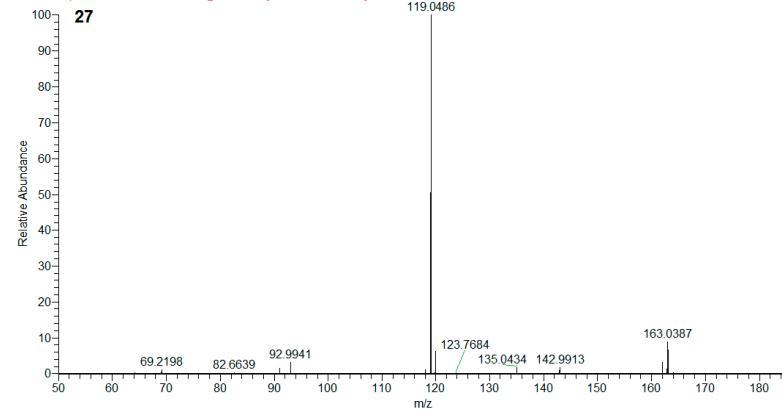

F: FTMS - p ESI d Full ms2 167.0339@hcd33.33 [50.0000-190.0000]

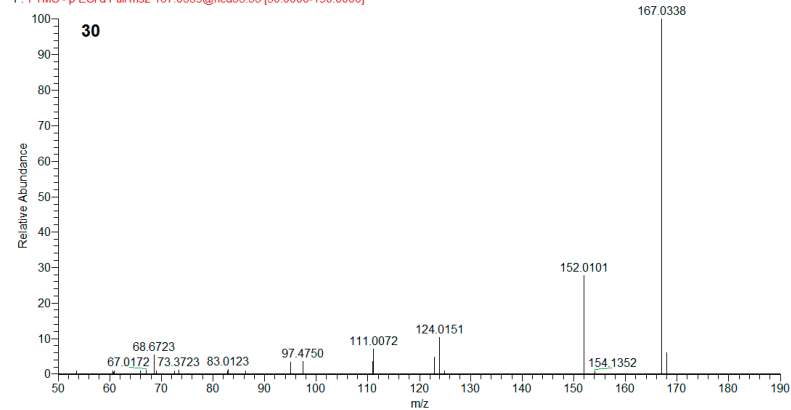

F: FTMS - p ESI d Full ms2 163.0389@hcd33.33 [50.0000-185.0000]

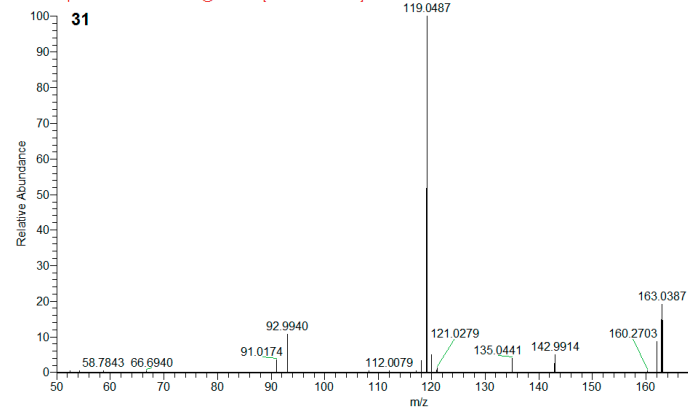

F: FTMS - p ESI d Full ms2 491.1964@hcd33.33 [50.0000-520.0000]

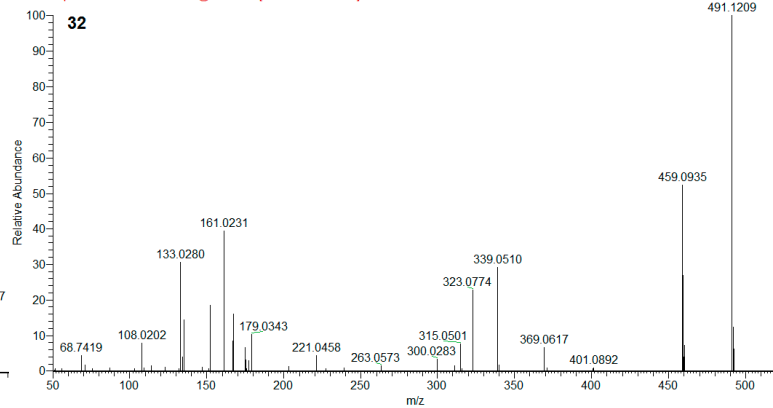

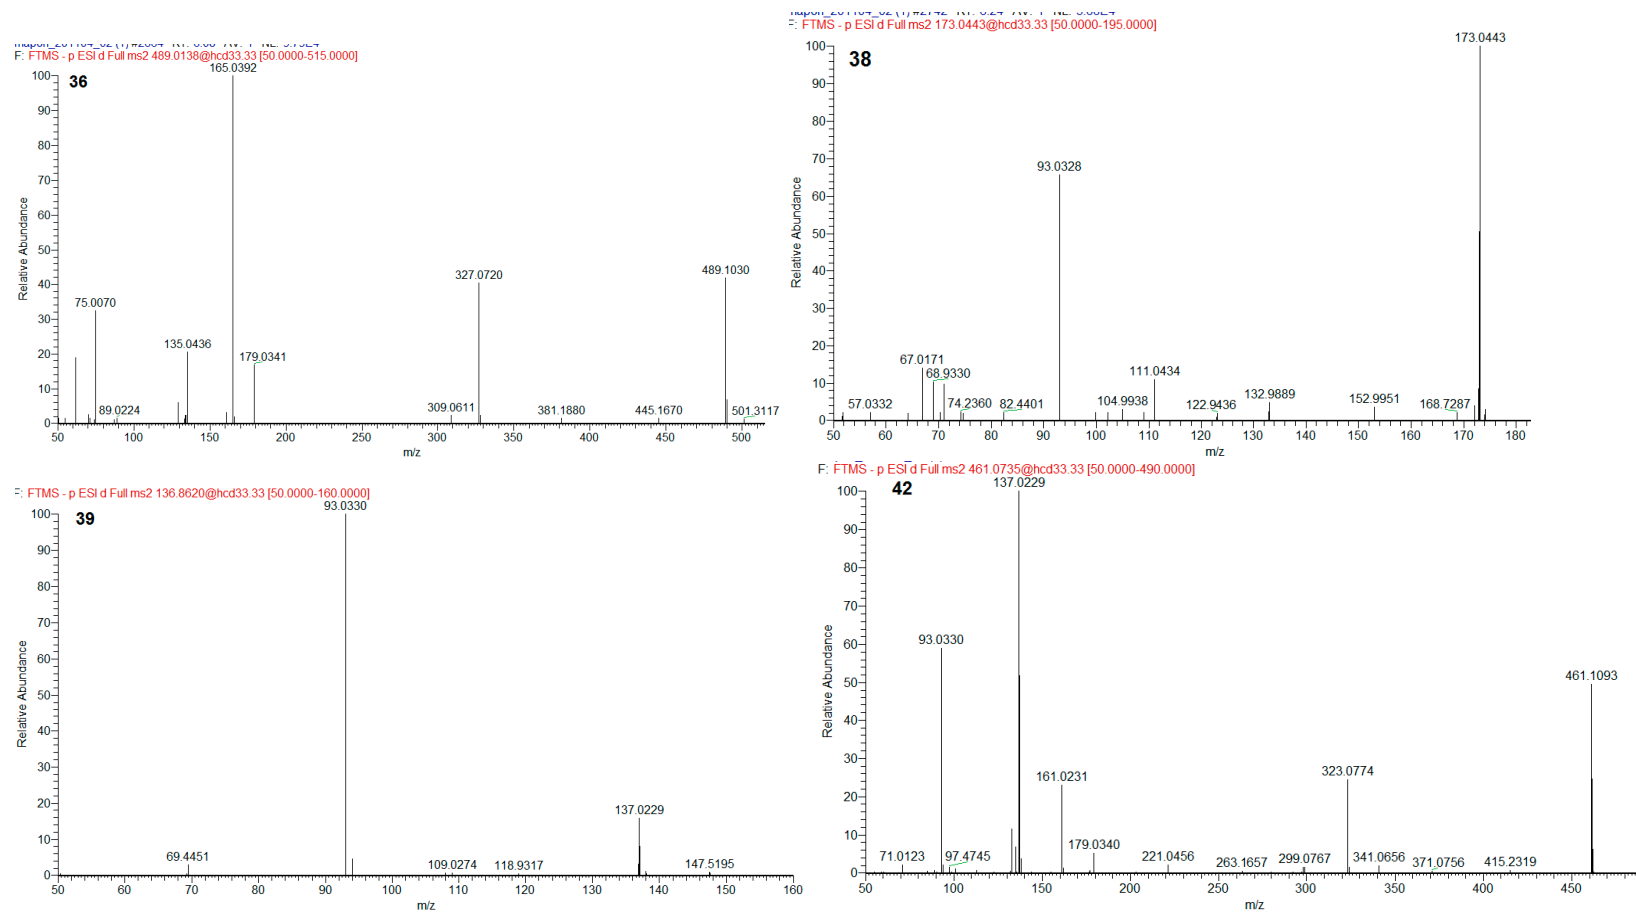

Figure S5. MS/MS spectra of hydroxybenzoic, hydroxycinnamic acids and their glycosides, and sugar esters (for the compound numbers see Table 2).

F: FTMS - p ESI d Full ms2 353.0493@hcd33.33 [50.0000-380.0000]

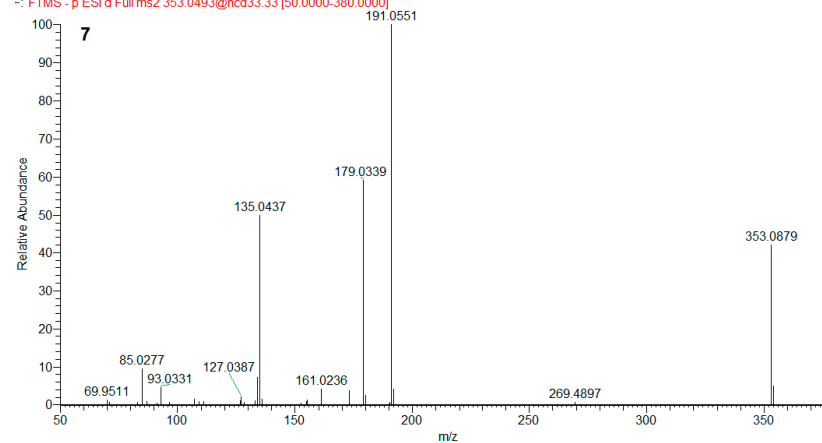

F: FTMS - p ESI d Full ms2 353.0883@hcd33.33 [50.0000-380.0000]

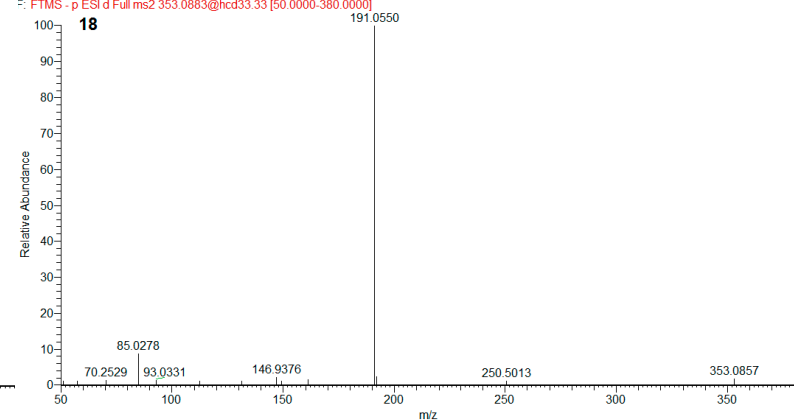

F: FTMS - p ESI d Full ms2 367.1919@hcd33.33 [50.0000-395.0000]

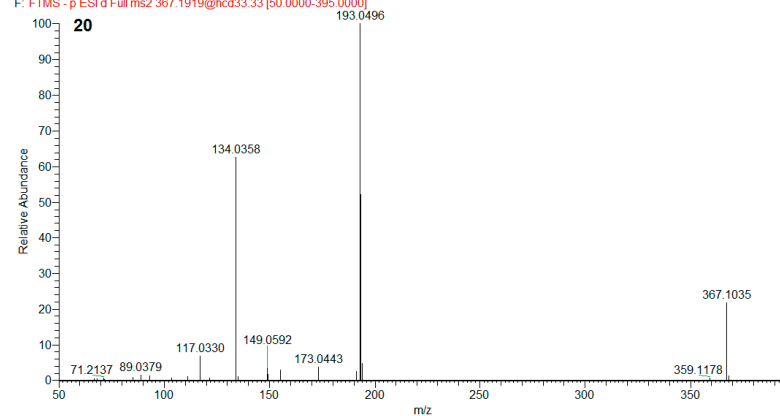

F: FTMS - p ESI d Full ms2 336.9735@hcd33.33 [50.0000-360.0000]

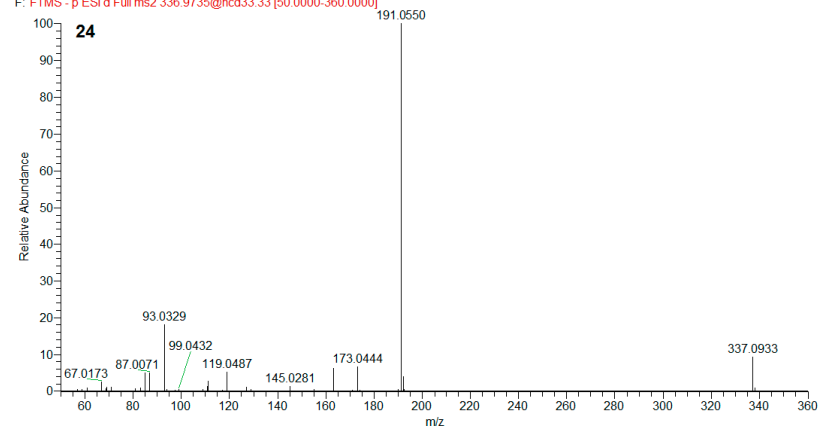

FTMS - p ESI d Full ms2 515.1203@hcd33.33 [50.0000-545.0000]

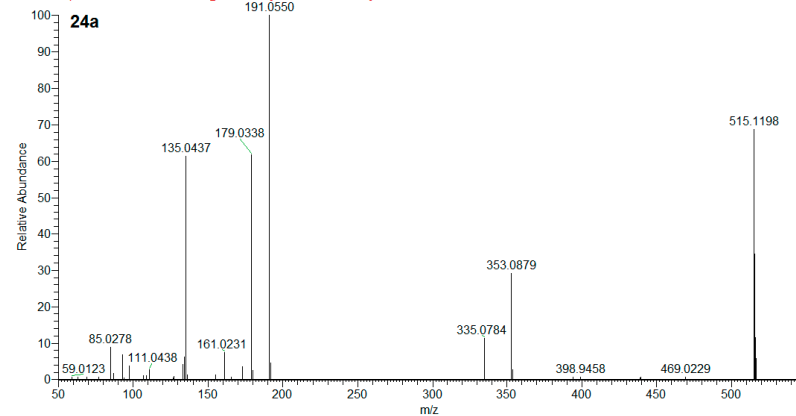

FTMS - p ESI d Full ms2 367.1919@hcd33.33 [50.0000-395.0000]

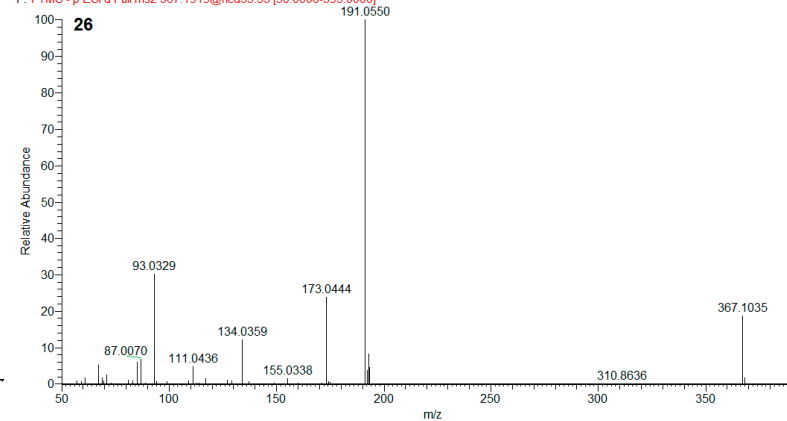

FTMS - p ESI d Full ms2 336.9735@hcd33.33 [50.0000-360.0000]

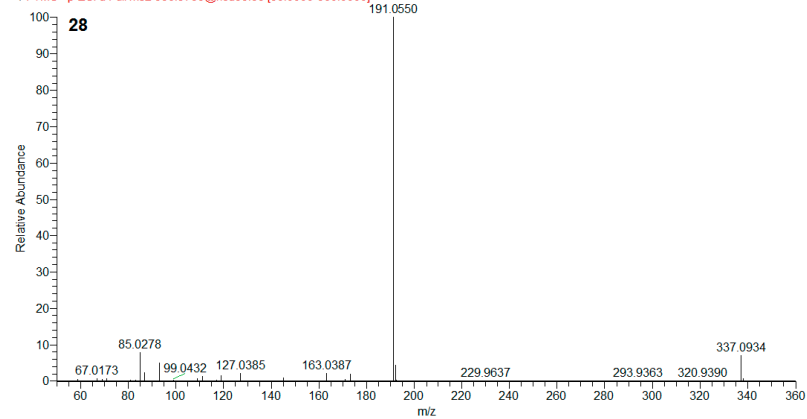

FTMS - p ESI d Full ms2 367.1919@hcd33.33 [50.0000-395.0000]

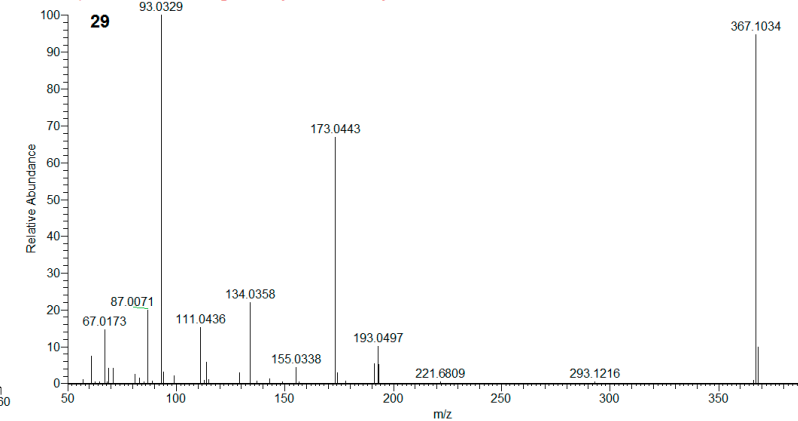

11: FTMS - p ESI d Full ms2 515.1203@hcd33.33 [50.0000-545.0000]

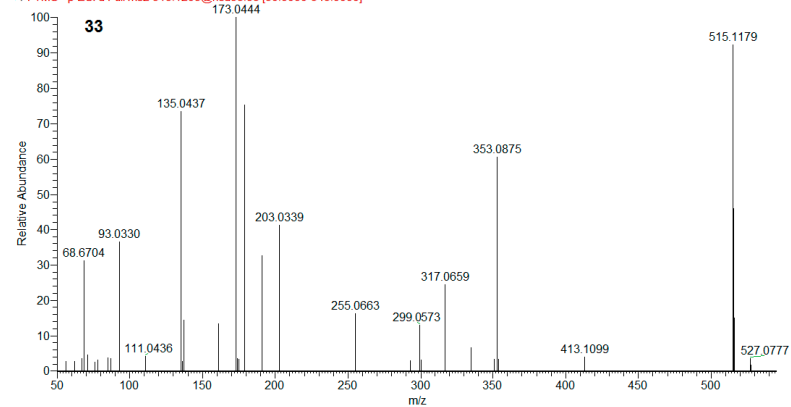

F: FTMS - p ESI d Full ms2 515.1203@hcd33.33 [50.0000-545.0000]

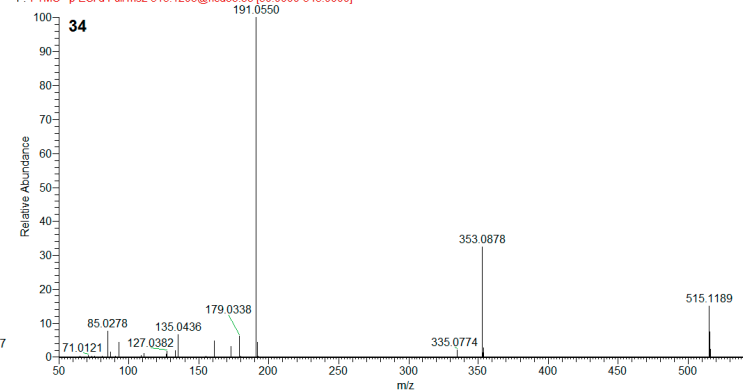

12: FTMS - p ESI d Full ms2 515.1203@hcd33.33 [50.0000-545.0000]

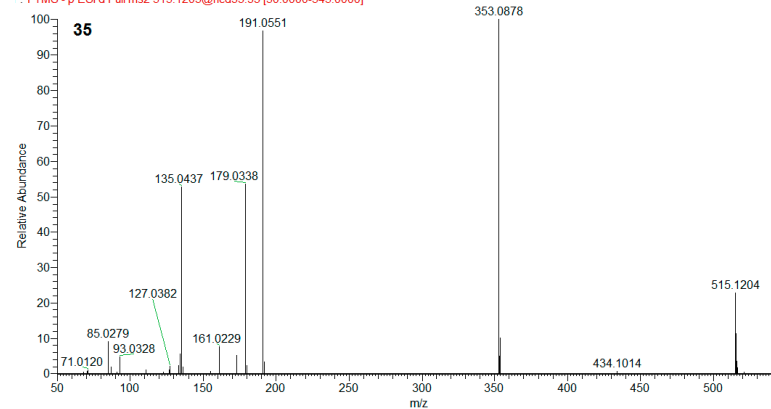

F: FTMS - p ESI d Full ms2 515.1203@hcd33.33 [50.0000-545.0000]

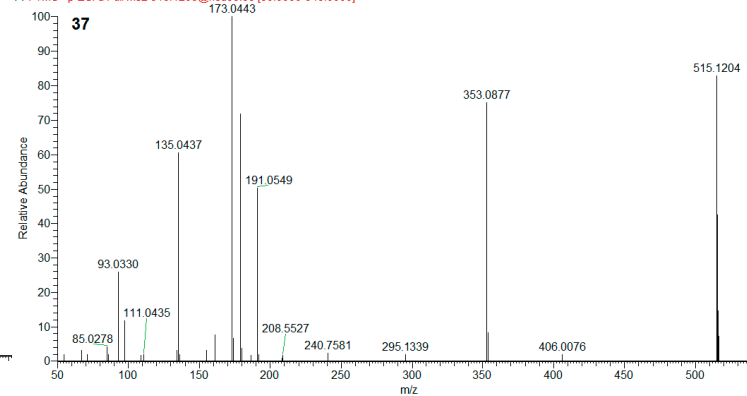

F: FTMS - p ESI'd Full ms2 529.0977@hcd33.33 [50.0000-560.0000]

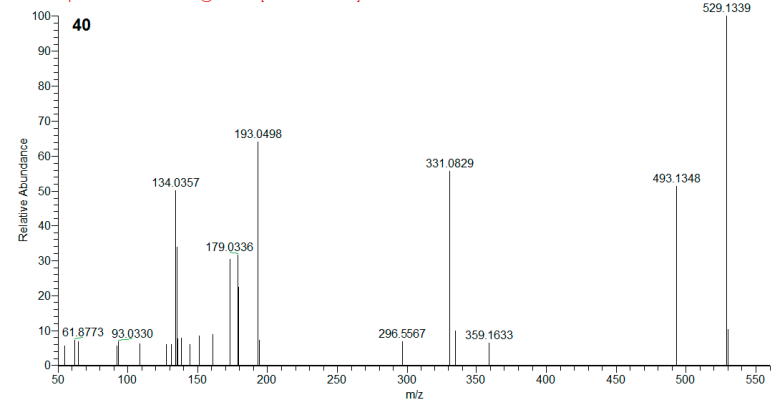

F: FTMS - p ESI'd Full ms2 499.2092@hcd33.33 [50.0000-530.0000]

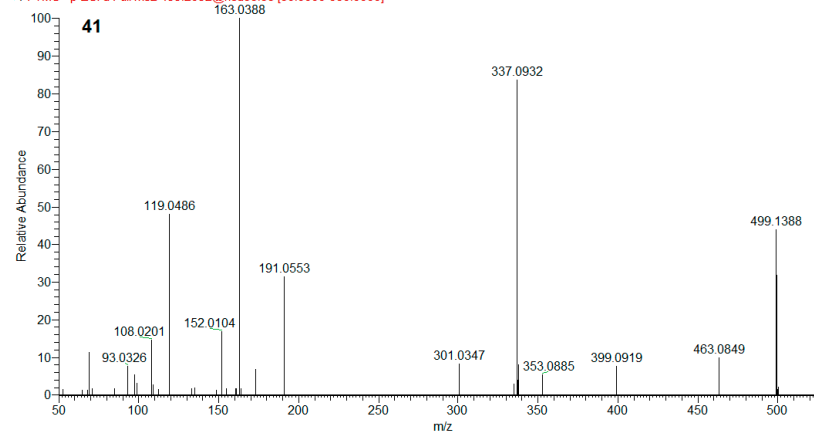

F: FTMS - p ESI'd Full ms2 529.0977@hcd33.33 [50.0000-560.0000]

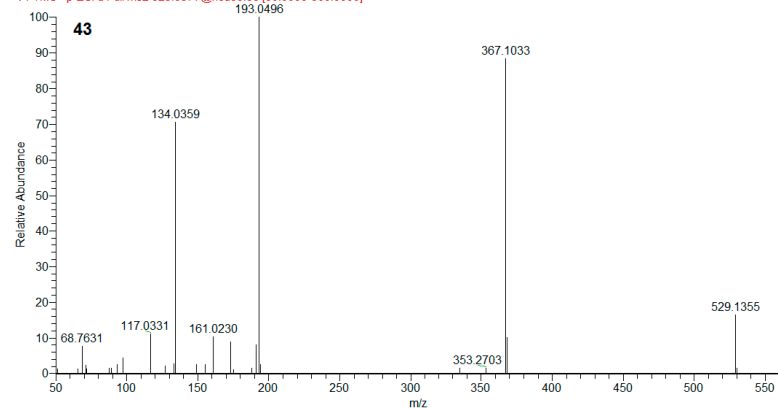

F: FTMS - p ESI'd Full ms2 499.2092@hcd33.33 [50.0000-530.0000]

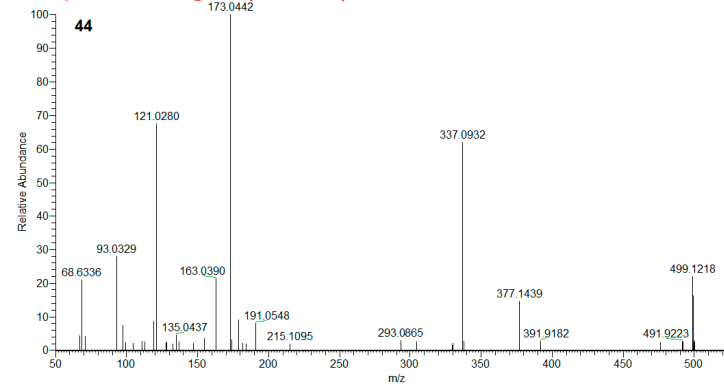

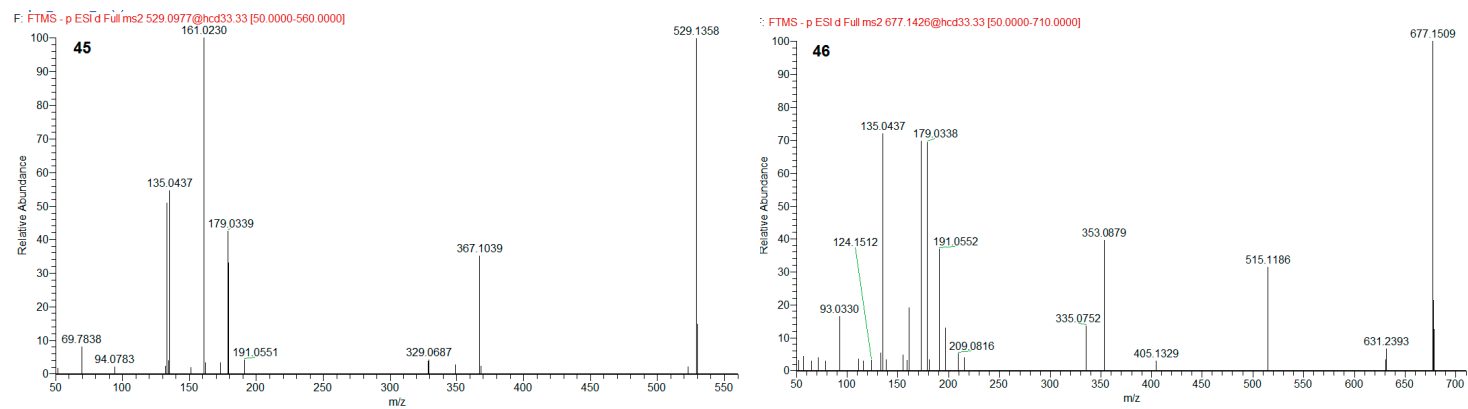

Figure S6. MS/MS spectra of acylquinic acids (for the compound numbers see Table 2).

FTMS - p ESI d Full ms2 608.9992@hcd33.33 [50.0000-640.0000]

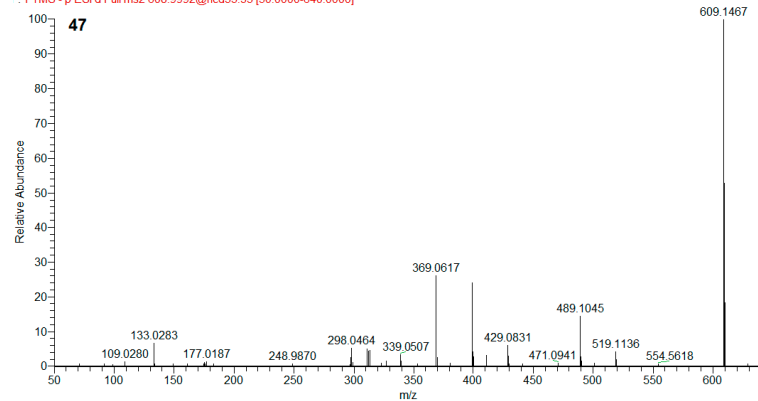

FTMS - p ESI d Full ms2 608.9992@hcd33.33 [50.0000-640.0000]

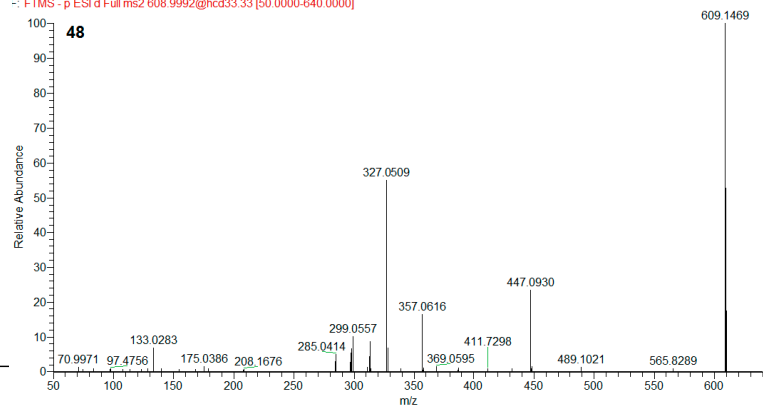

FTMS - p ESI d Full ms2 593.0060@hcd33.33 [50.0000-625.0000]

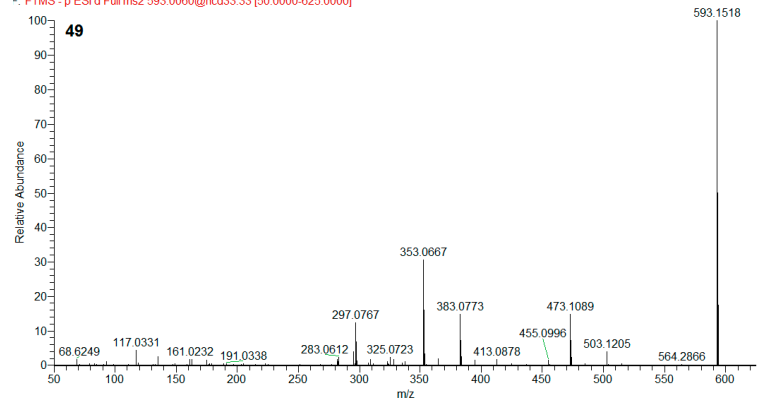

FTMS - p ESI d Full ms2 579.1354@hcd33.33 [50.0000-610.0000]

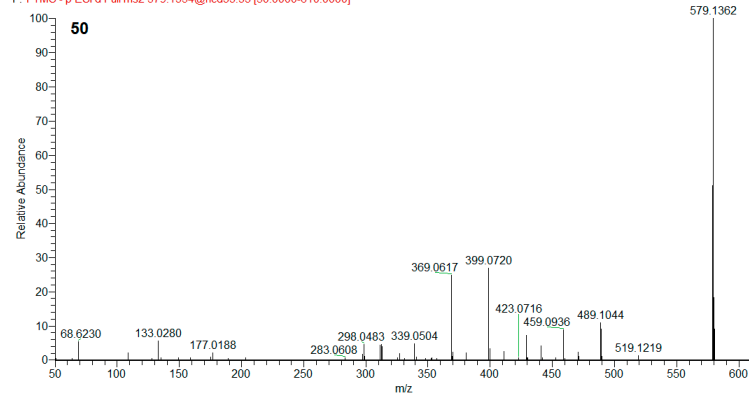

F: FTMS - p ESI'd Full ms2 579.1354@hcd33.33 [50.0000-610.0000]

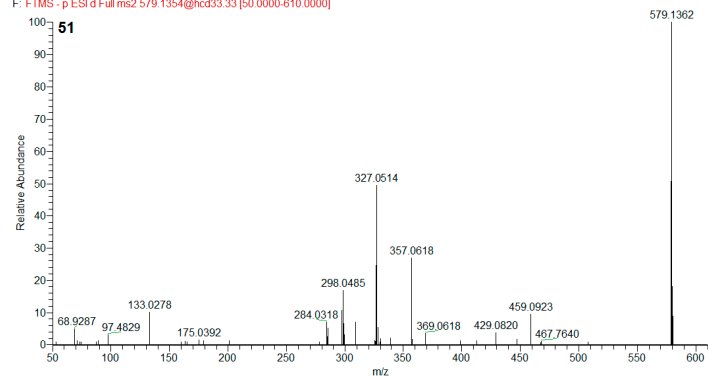

F: FTMS - p ESI'd Full ms2 447.0935@hcd33.33 [50.0000-475.0000]

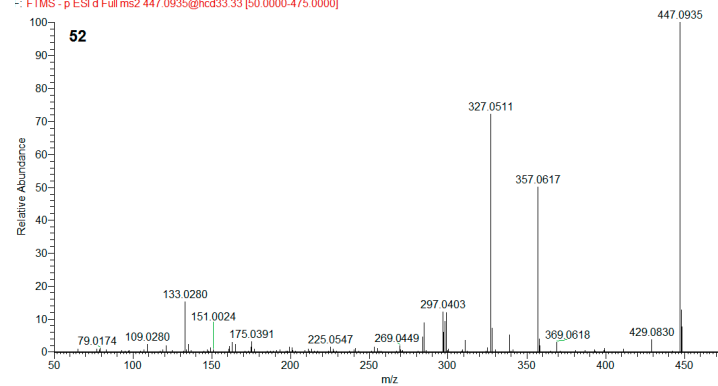

F: FTMS - p ESI'd Full ms2 563.1060@hcd33.33 [50.0000-595.0000]

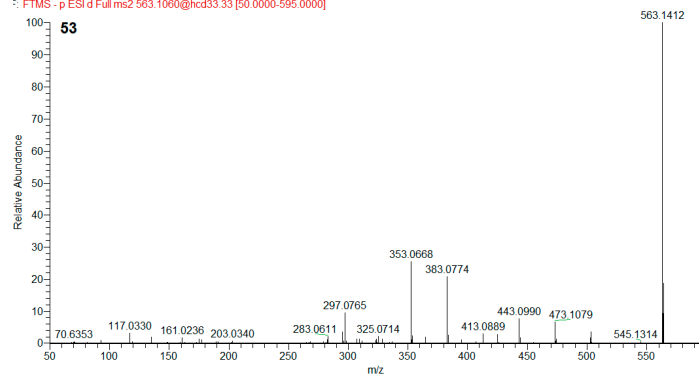

F: FTMS - p ESI'd Full ms2 447.0935@hcd33.33 [50.0000-475.0000]

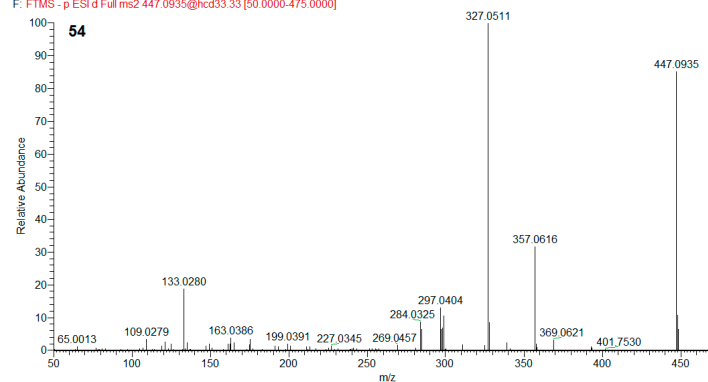

F: FTMS - p ESI d Full ms2 593.0060@hcd33.33 [50.0000-625.0000]

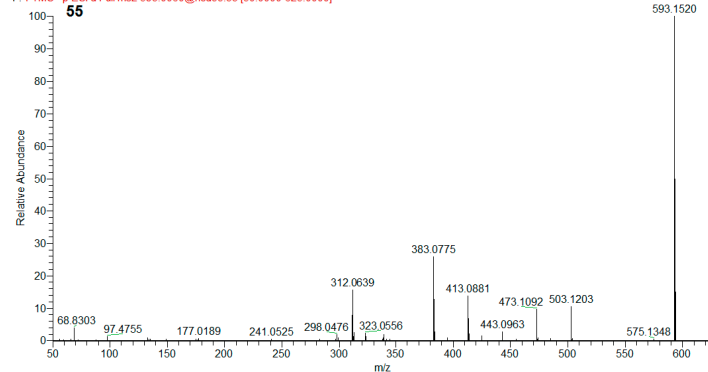

F: FTMS - p ESI d Full ms2 608.9992@hcd33.33 [50.0000-640.0000]

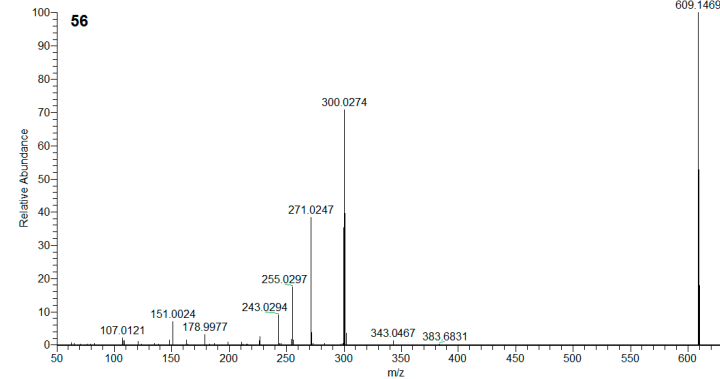

F: FTMS - p ESI d Full ms2 431.0990@hcd33.33 [50.0000-460.0000]

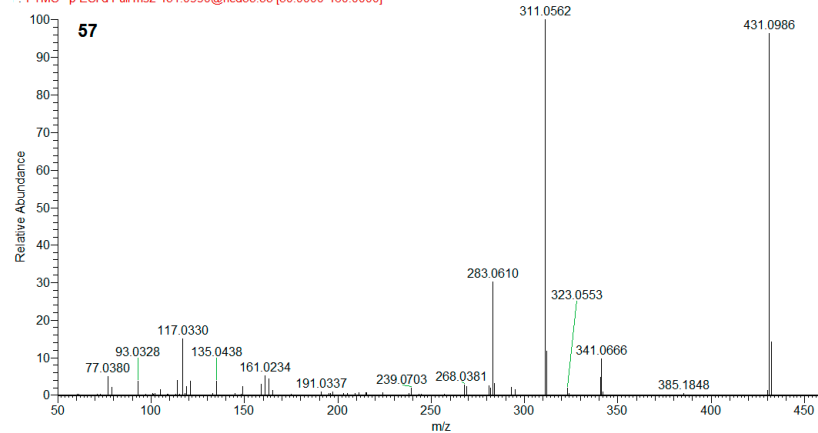

F: FTMS - p ESI d Full ms2 431.0985@hcd33.33 [50.0000-460.0000]

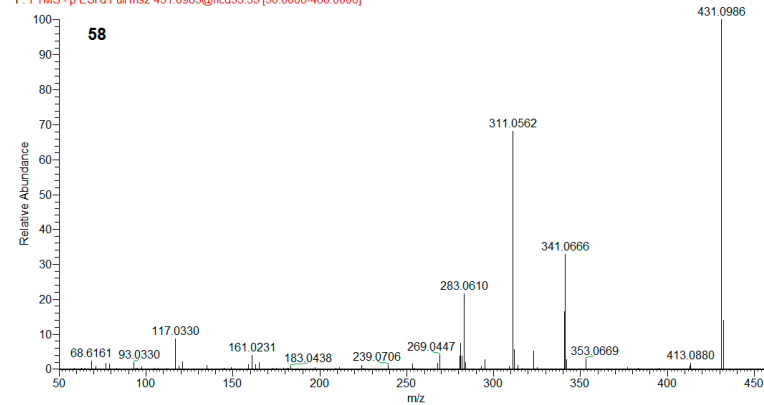

FTMS - p ESI d Full ms2 593.0060@hcd33.33 [50.0000-625.0000]

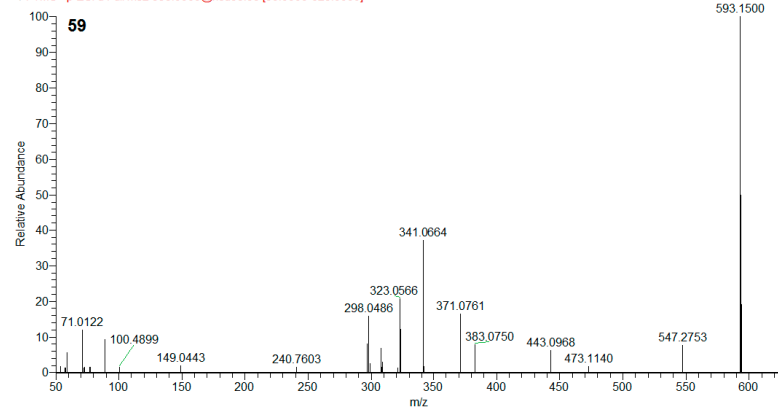

FTMS - p ESI d Full ms2 448.0975@hcd33.33 [50.0000-475.0000]

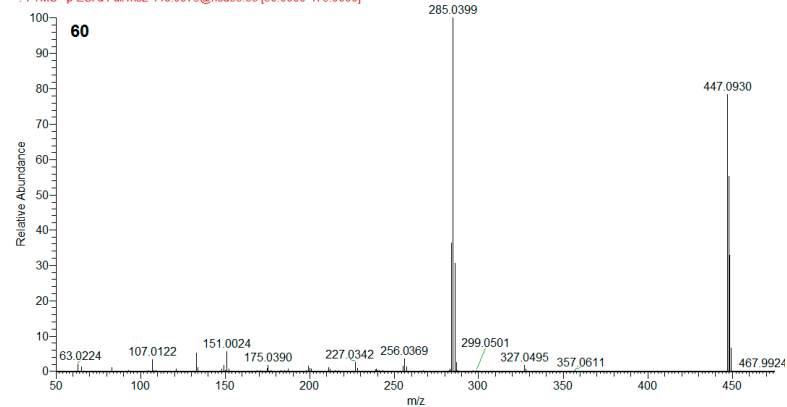

FTMS - p ESI d Full ms2 461.0735@hcd33.33 [50.0000-490.0000]

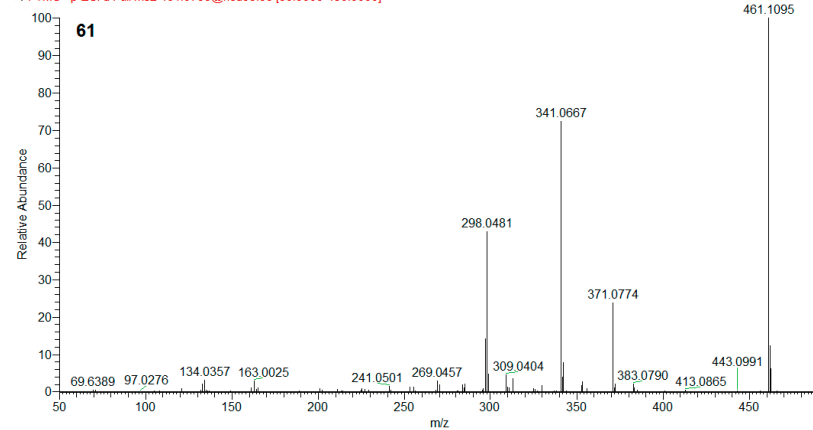

FTMS - p ESI d Full ms2 447.0935@hcd33.33 [50.0000-475.0000]

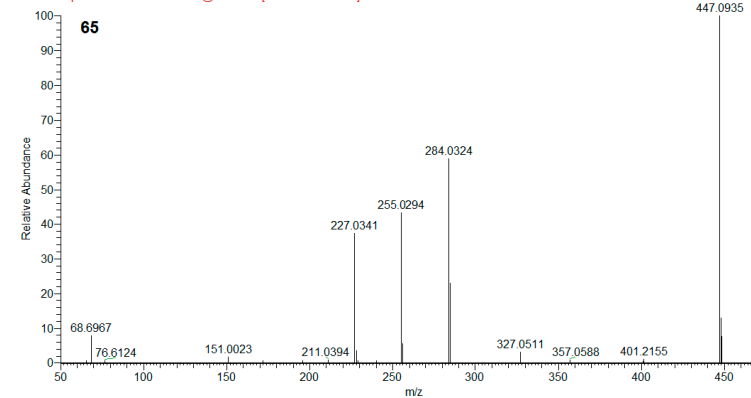

F: FTMS - p ESI<sup>-</sup> d Full ms2 477.0682@hcd33.33 [50.0000-505.0000]

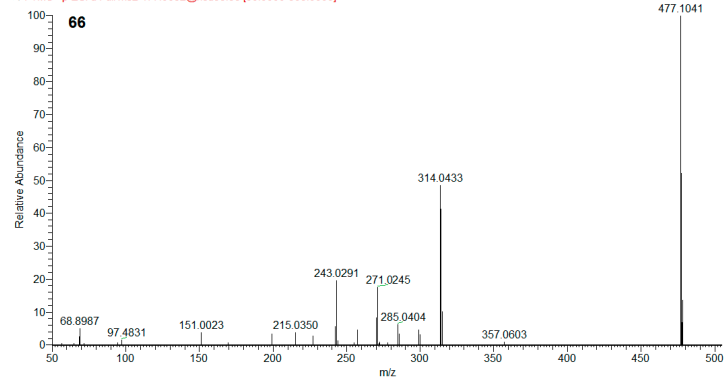

F: FTMS - p ESI<sup>-</sup> d Full ms2 431.0990@hcd33.33 [50.0000-460.0000]

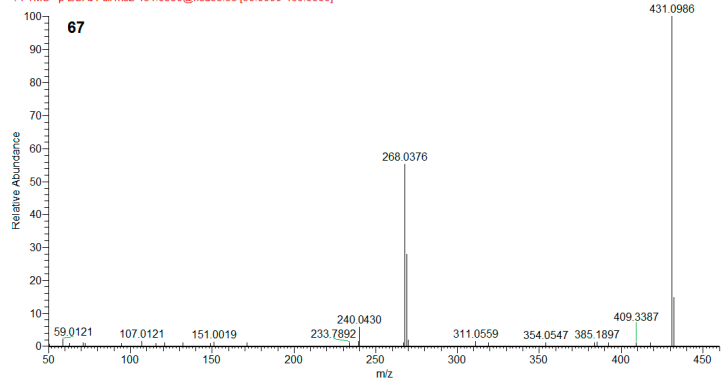

F: FTMS - p ESI<sup>-</sup> d Full ms2 475.0886@hcd33.33 [50.0000-505.0000]

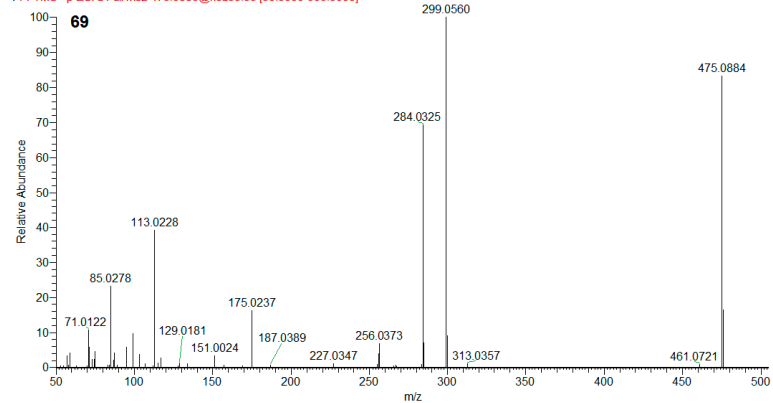

F: FTMS - p ESI<sup>-</sup> d Full ms2 285.0409@hcd33.33 [50.0000-310.0000]

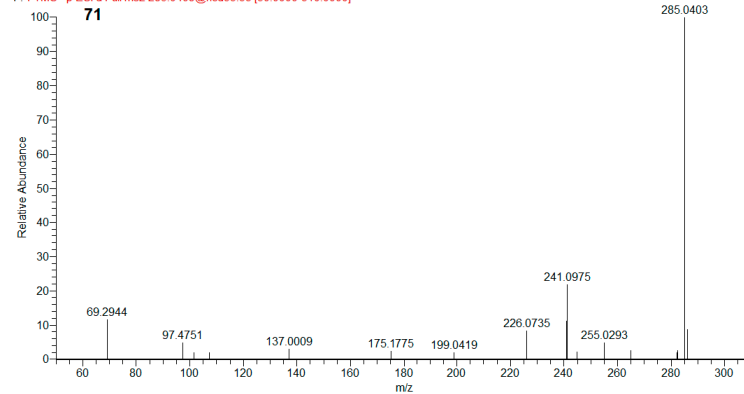

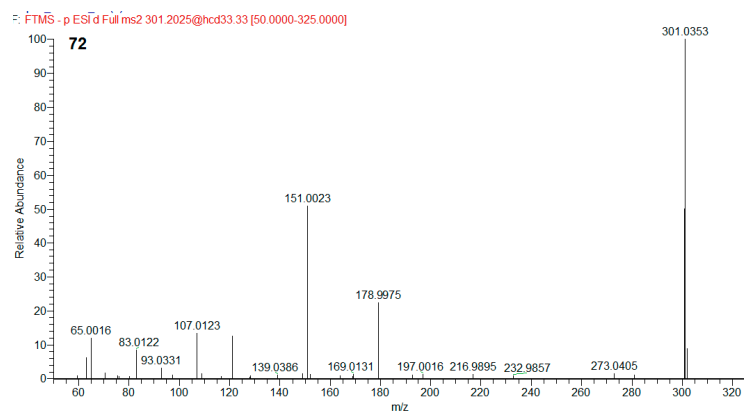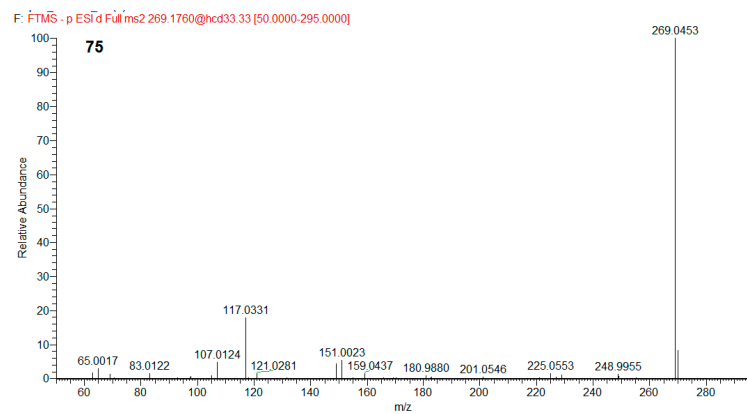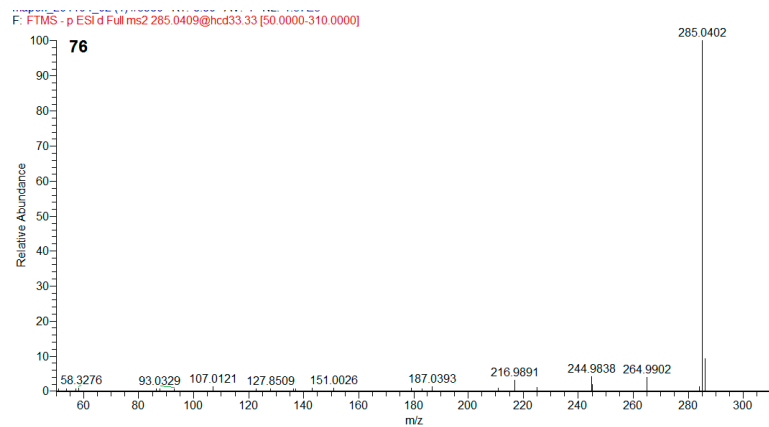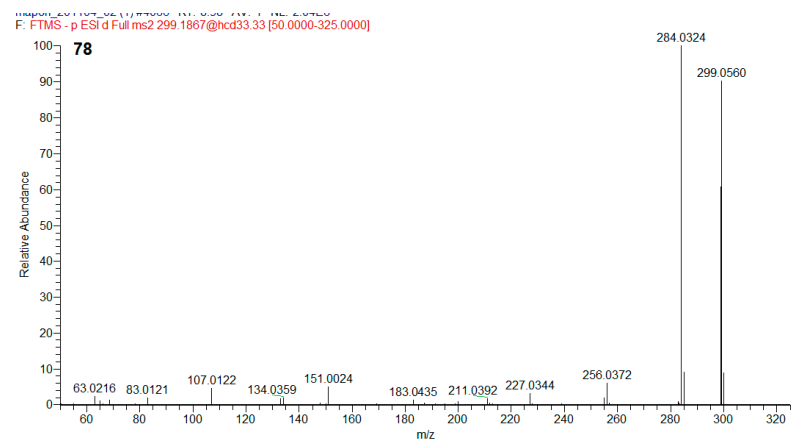

Figure S7. MS/MS spectra of C-, C,O- and O-flavonoid glycosides(for the compound numbers see Table 2).

F: FTMS - p ESI d Full ms2 491.1959@hcd33.33 [50.0000-520.0000]

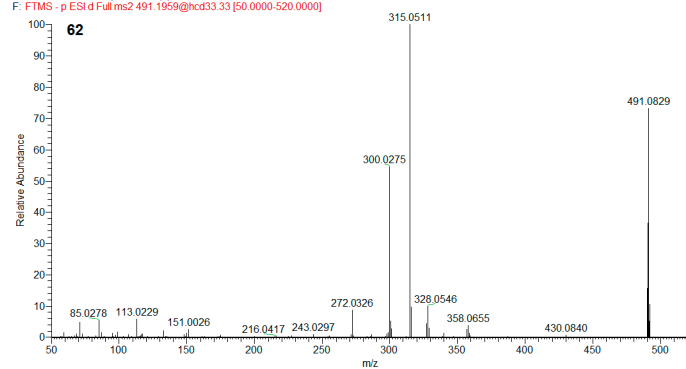

F: FTMS - p ESI d Full ms2 477.0682@hcd33.33 [50.0000-505.0000]

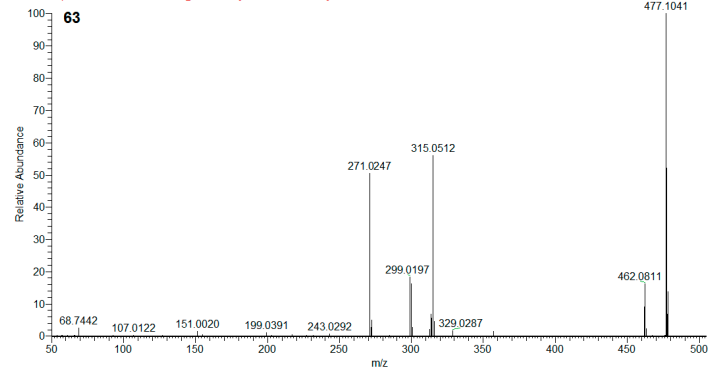

F: FTMS - p ESI d Full ms2 477.0682@hcd33.33 [50.0000-505.0000]

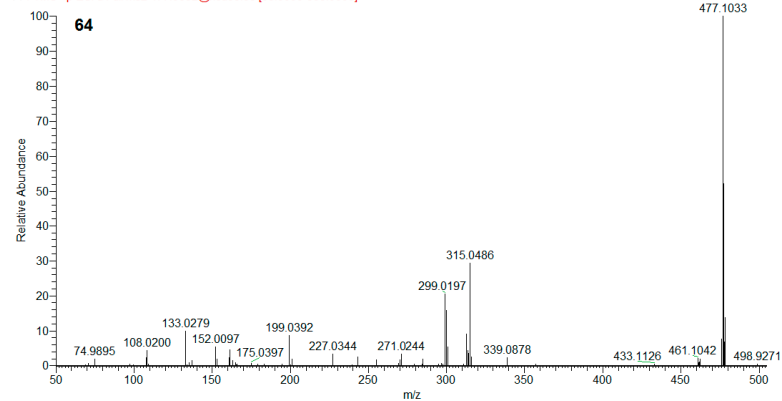

F: FTMS - p ESI d Full ms2 491.1964@hcd33.33 [50.0000-520.0000]

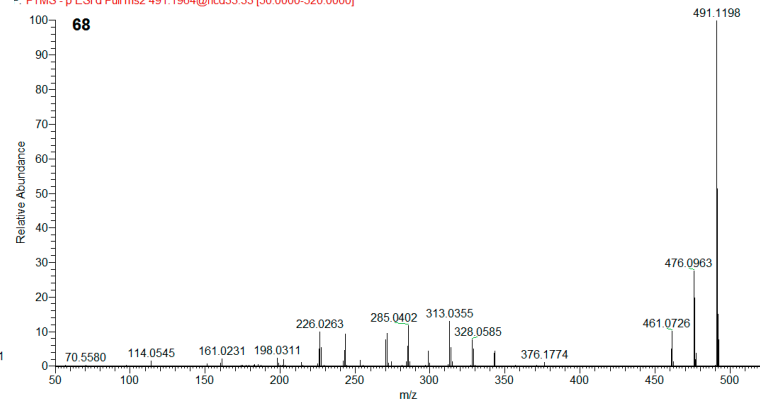

F: FTMS - p ESI d Full ms2 505.0111@hcd33.33 [50.0000-535.0000]

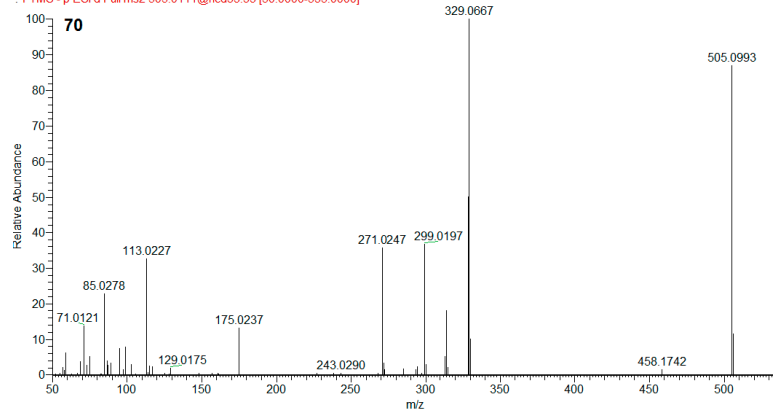

F: FTMS - p ESI d Full ms2 331.2048@hcd33.33 [50.0000-355.0000]

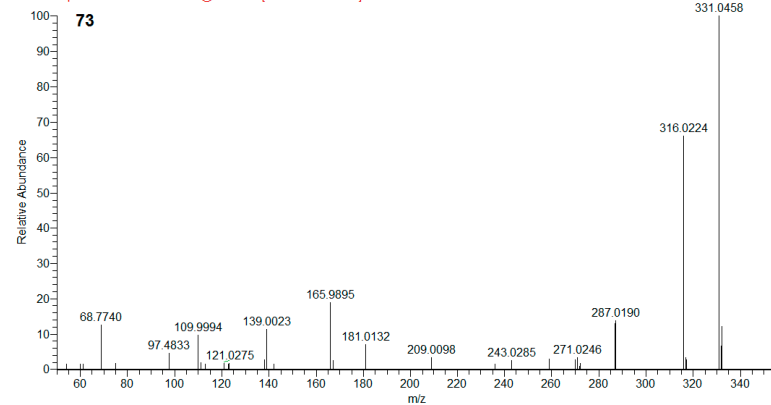

F: FTMS - p ESI d Full ms2 345.1840@hcd33.33 [50.0000-370.0000]

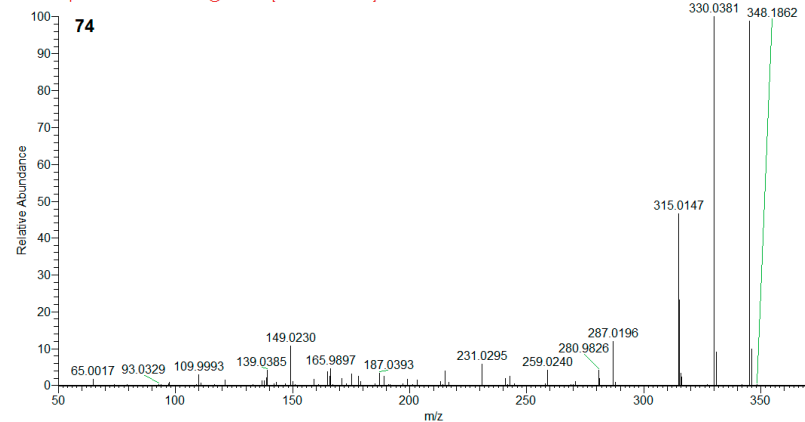

F: FTMS - p ESI d Full ms2 299.1868@hcd33.33 [50.0000-325.0000]

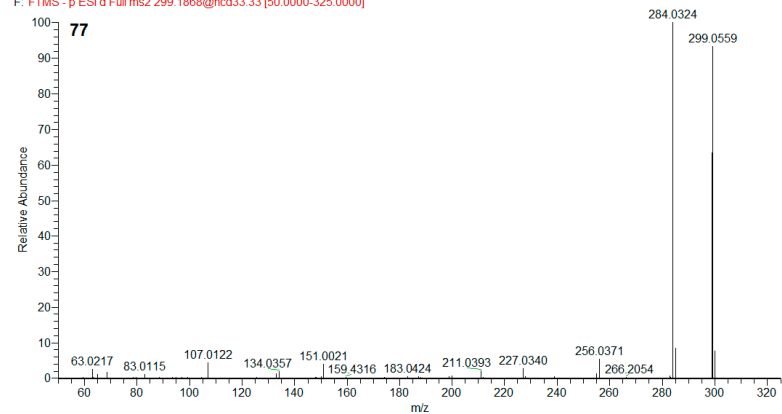

F: FTMS - p ESI d Full ms2 329.1246@hcd33.33 [50.0000-355.0000]

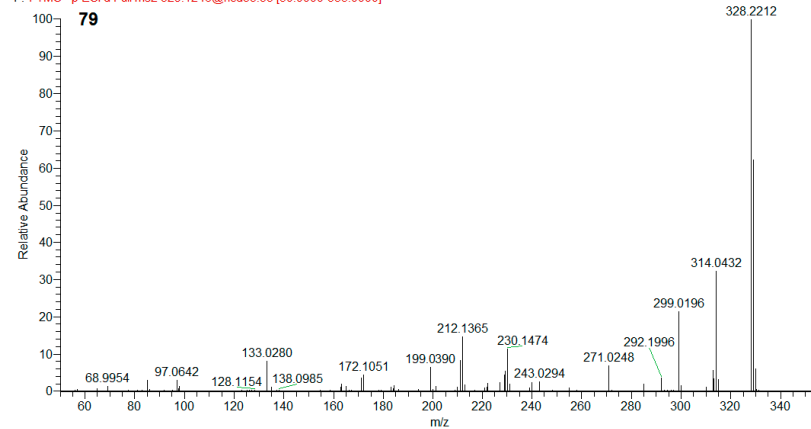

F: FTMS - p ESI d Full ms2 358.9944@hcd33.33 [50.0000-385.0000]

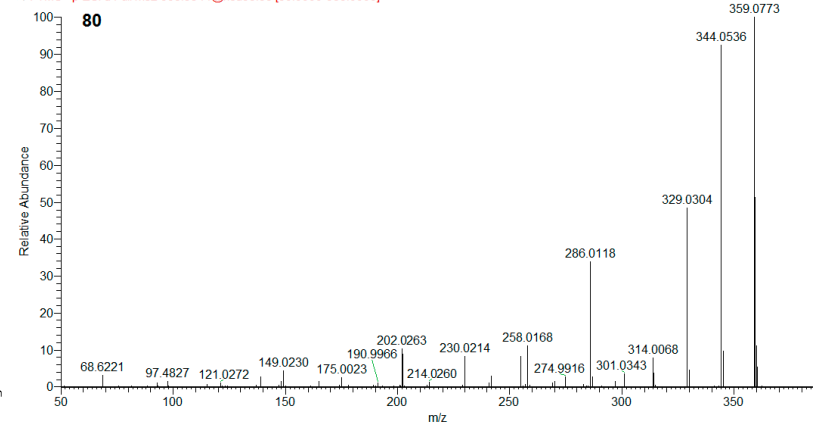

F: FTMS - p ESI d Full ms2 313.0569@hcd33.33 [50.0000-340.0000]

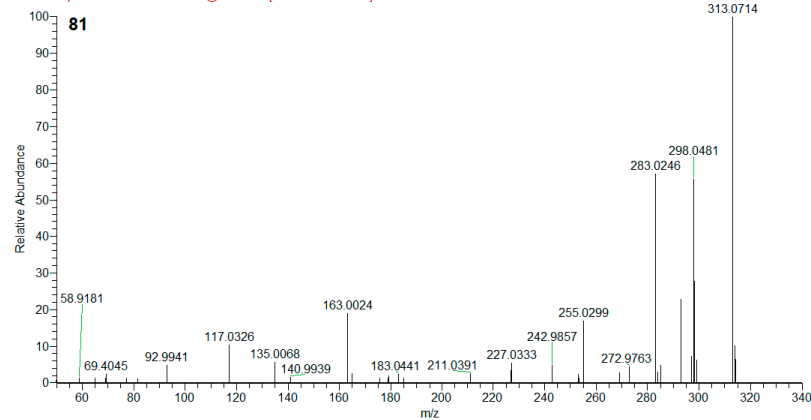

F: FTMS - p ESI d Full ms2 343.0001@hcd33.33 [50.0000-370.0000]

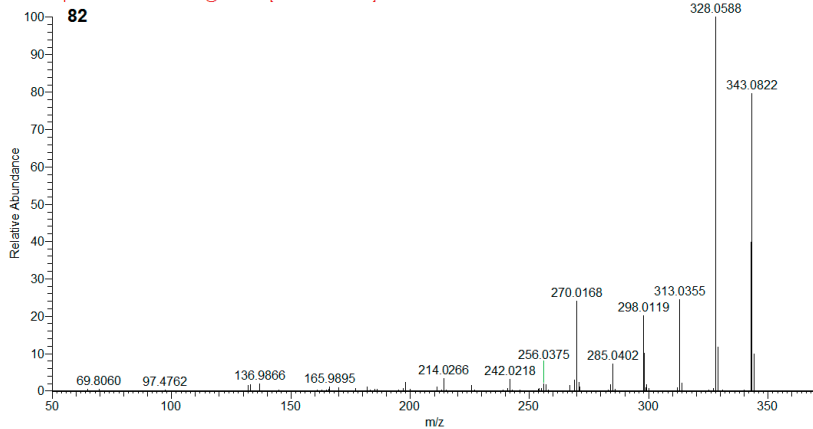

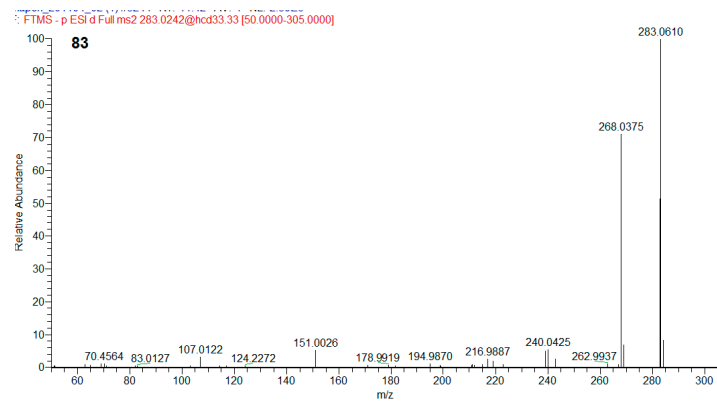

Figure S8. MS/MS spectra of 6-methoxyflavonoids (aglycones and glycosides) (for the compound numbers see Table 2).

F: FTMS + p ESI d Full ms2 279.0472@hcd33.33 [50.0000-305.0000]

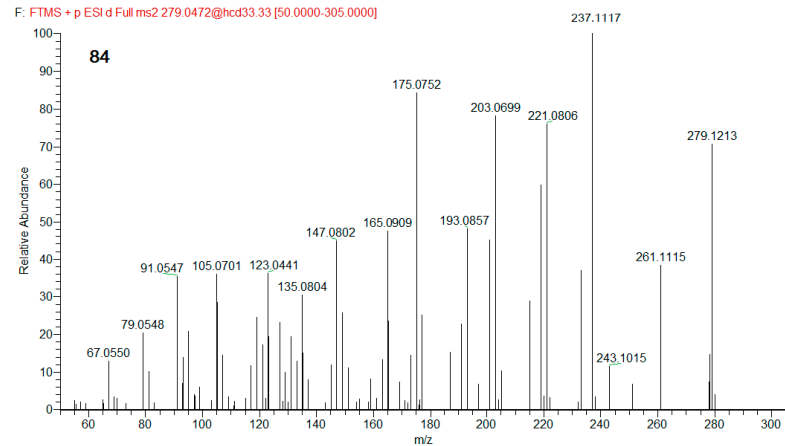

F: FTMS + p ESI d Full ms2 307.0782@hcd33.33 [50.0000-330.0000]

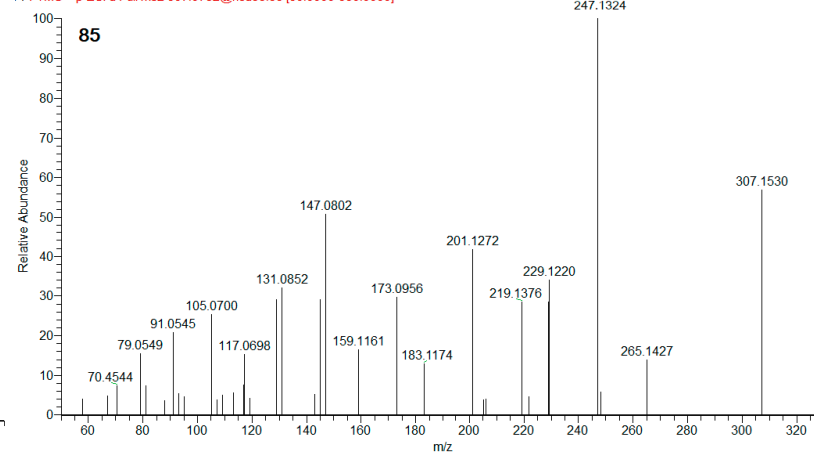

F: FTMS + p ESI d Full ms2 245.1170@hcd33.33 [50.0000-270.0000]

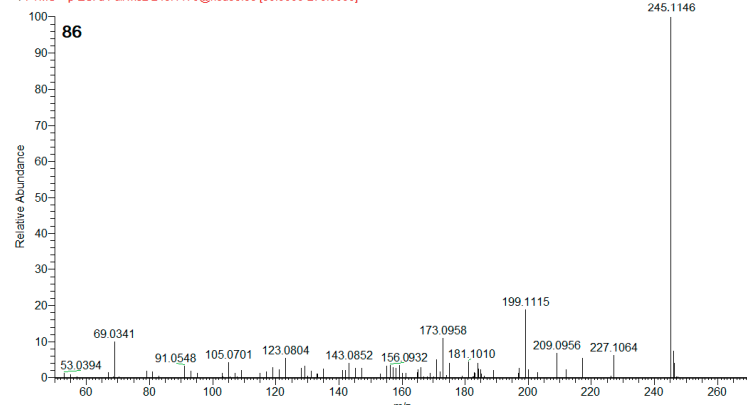

F: FTMS + p ESI d Full ms2 247.0810@hcd33.33 [50.0000-270.0000]

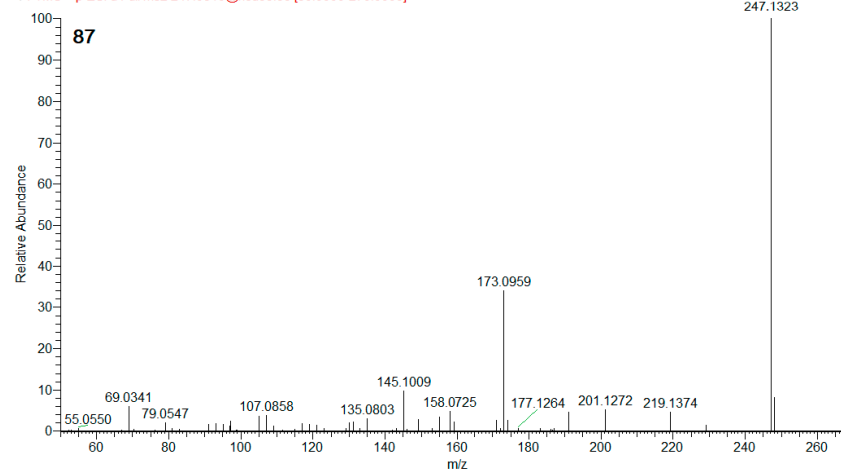

F: FTMS + p ESI d Full ms2 249.0370@hcd33.33 [50.0000-275.0000]

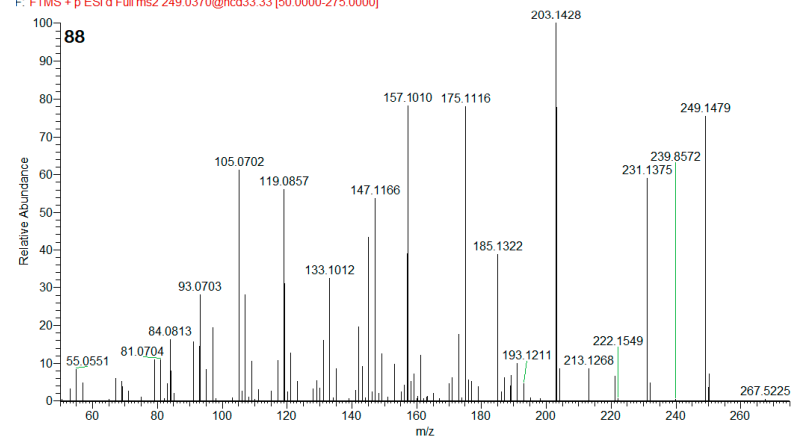

F: FTMS + p ESI d Full ms2 251.0760@hcd33.33 [50.0000-275.0000]

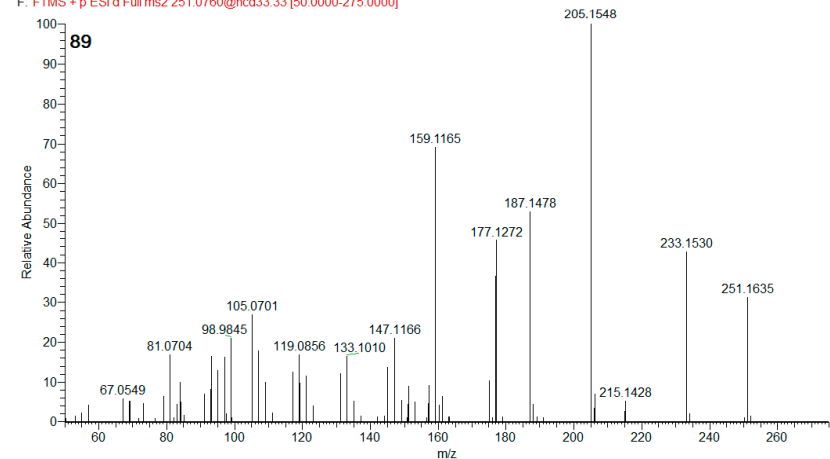

F: FTMS + p ESI d Full ms2 224.2006@hcd33.33 [50.0000-245.0000]

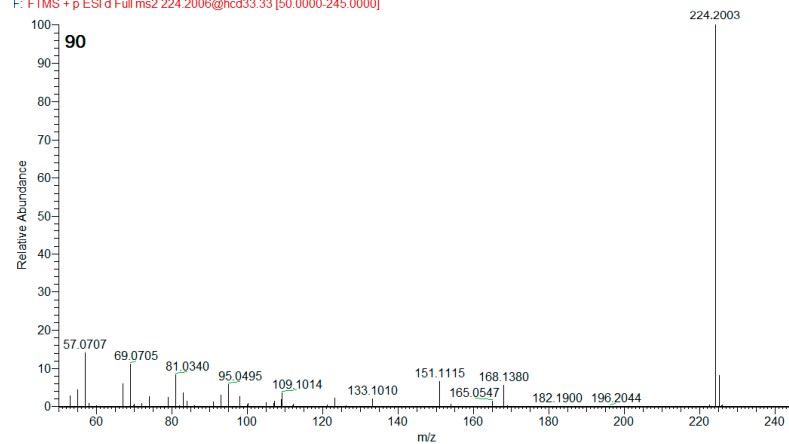

F: FTMS + p ESI d Full ms2 278.2110@hcd33.33 [50.0000-300.0000]

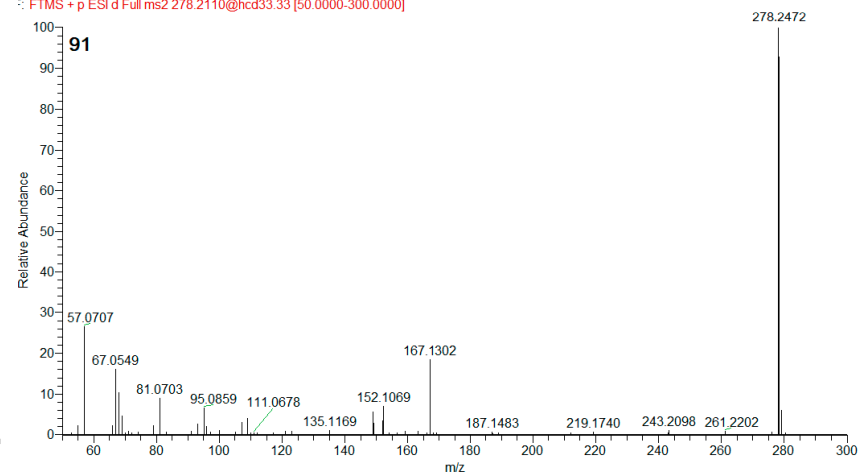

FTMS + p ESI d Full ms2 280.1905@hcd33.33 [50.0000-305.0000]

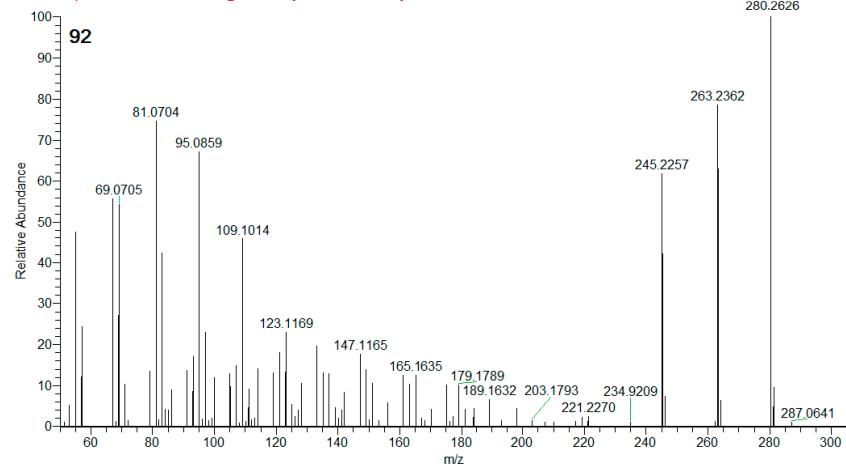

FTMS + p ESI d Full ms2 256.1693@hcd33.33 [50.0000-280.0000]

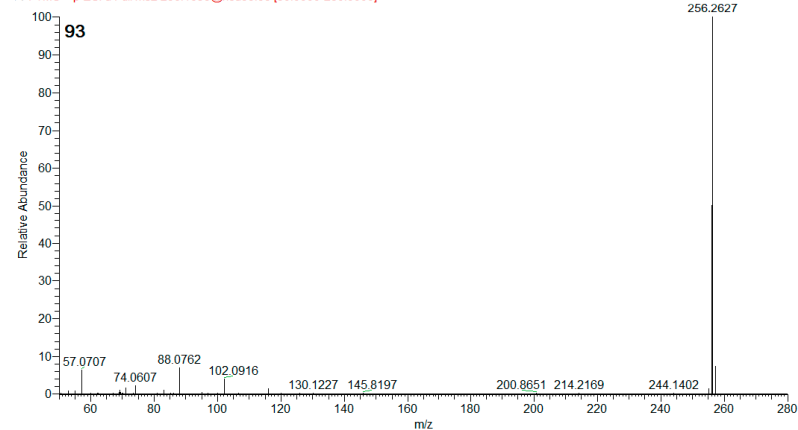

FTMS + p ESI d Full ms2 282.0784@hcd33.33 [50.0000-305.0000]

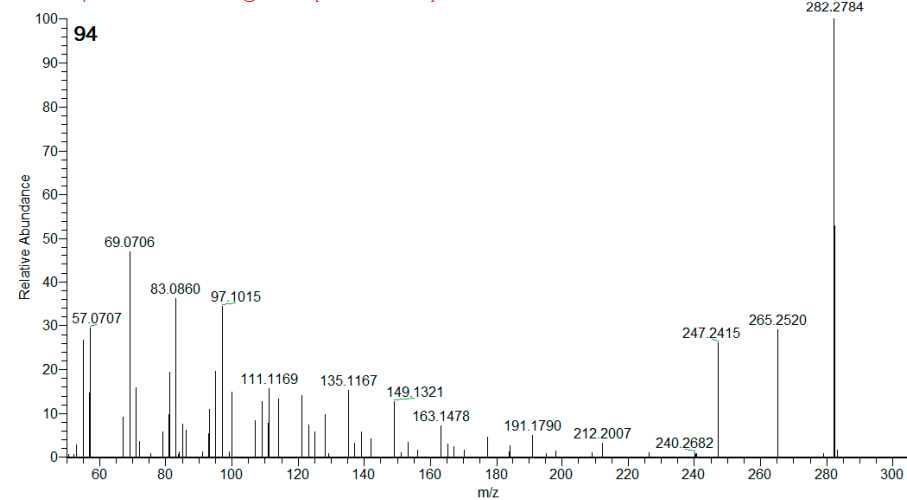

Figure S9. MS/MS spectra of sesquiterpene lactones (for the compound numbers see Table 2).
